# Supplementary material for: The evolutionary history of bears is characterized by gene flow across species
Source: PubMed Central journal article supplement (PMC5395953; doi:10.1038/srep46487), 2017-04-19
Supplement: srep46487-s1.pdf [file srep46487-s1.pdf]

1 **Supplementary Information**

2  
3 **The evolutionary history of bears is characterized by gene flow across species**

4 Vikas Kumar, Fritjof Lammers, Tobias Bidon, Markus Pfenninger, Lydia Kolter, Maria A. Nilsson,  
5 Axel Janke \*

6  
7 \*correspondence to: [Axel.Janke@senckenberg.de](mailto:Axel.Janke@senckenberg.de)

8  
9  
10  
11 Supplementary Figures 1-22

12 Supplementary Tables 1-7

13 Supplementary Methods and References

14  
15  
16  
17  
18  
19  
20  
21  
22  
23  
24  
25  
26  
27  
28  
29  
30  
31  
32  
33  
34  
35  
36  
37  
38  
39

40 **Supplementary Figures**

41  
42

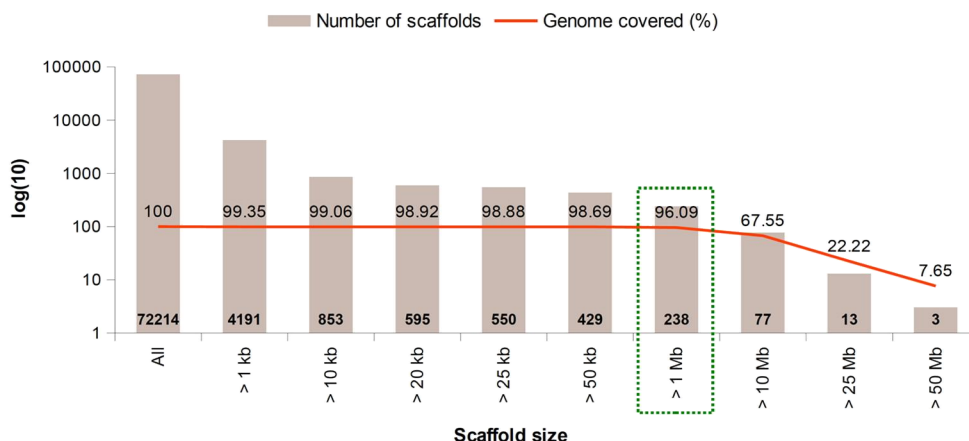

43 **Supplementary Fig. 1. Distribution of scaffolds lengths and percentage of polar bear reference**  
 44 **genome coverage in bins of different scaffold sizes.** The figure shows the percentage (number  
 45 above the red line) of genome coverage by the scaffolds. Bold face numbers show the number of  
 46 scaffolds in the respective bin. Scaffolds >1 Mb cover >96% (highlighted by the dashed green box)  
 47 of the polar bear genome and were used as a reference for mapping the reads of the other bear  
 48 genomes.

49

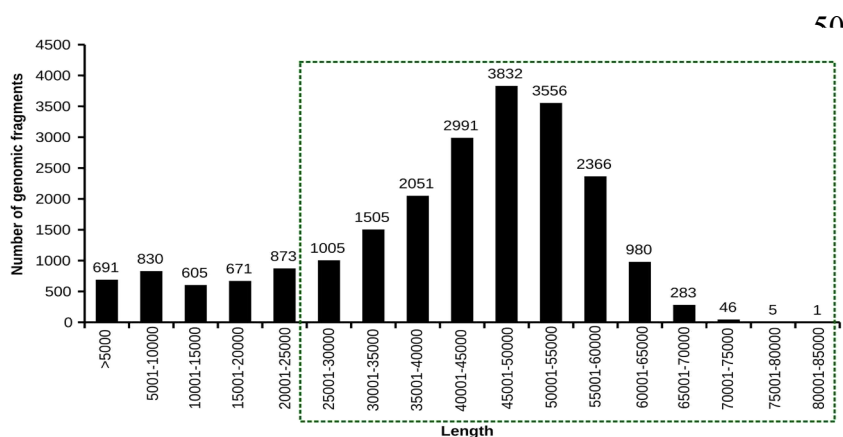

56 **Supplementary Fig. 2. Length distribution of genomic fragments after the removal of Ns, gaps**  
 57 **and repeat elements.** The highlighted region with the dashed green box shows the GFs with a  
 58 length greater than 25,000 bp (mean sequence length of 46,685 bp, standard deviation of 9,490 bp)  
 59 that were used for further analyses. The number above each bar represents the total number of  
 60 fragments in each bin. The total length of the 18,621 GF > 25 kb (dotted square) is 869,313,834 bp.

61  
62  
63  
64  
65  
66  
67  
68  
69  
70  
71  
72  
73  
74  
75  
76  
77  
78  
79  
80  
81  
82  
83  
84  
85  
86  
87  
88  
89  
90  
91  
92  
93  
94  
95  
96  
97  
98  
99  
100  
101  
102  
103  
104  
105  
106  
107

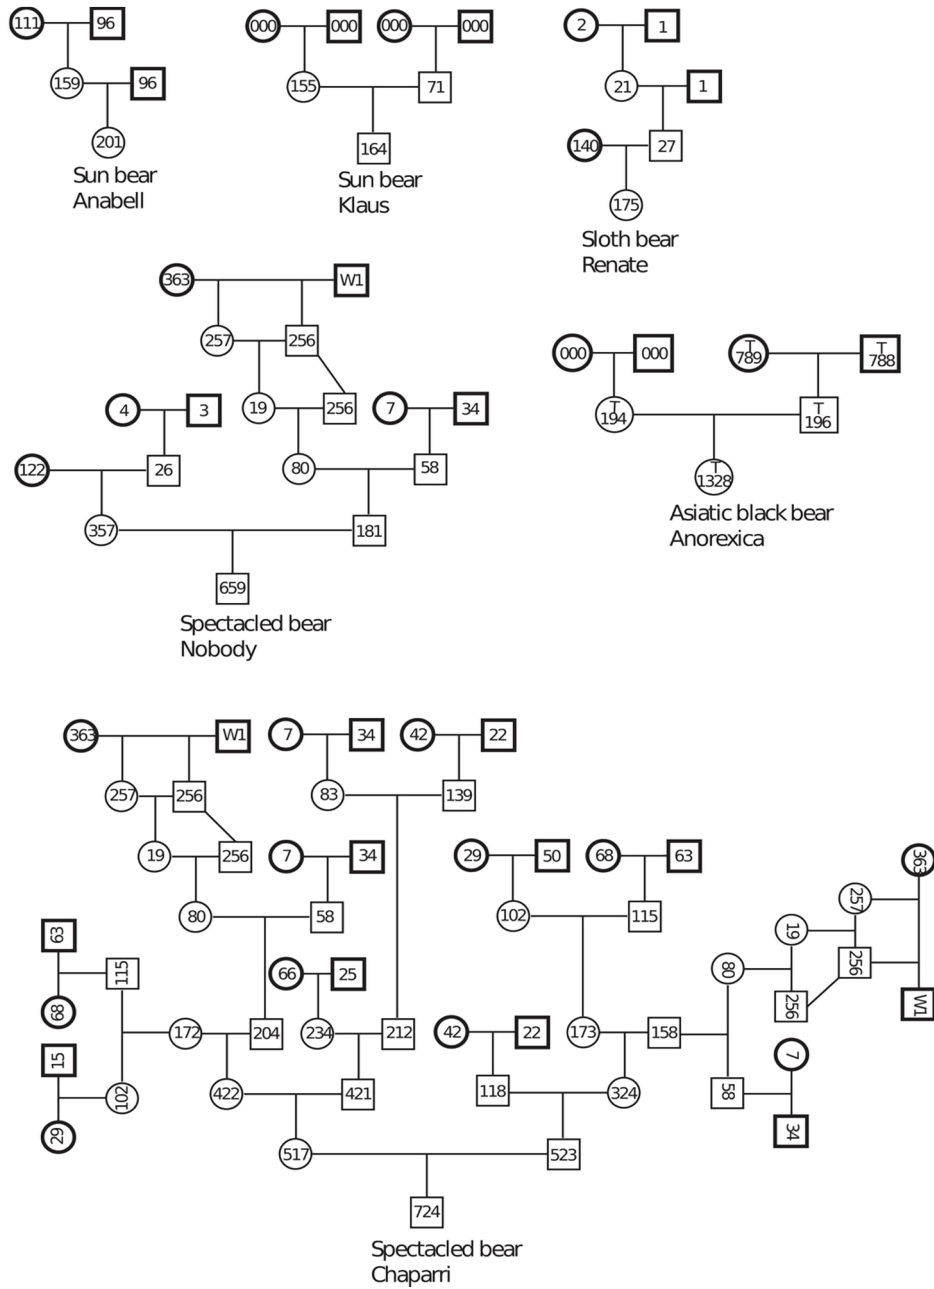

**Supplementary Fig. 3. Pedigrees of the captive individuals used in this study.** Circle indicates female, square male. Thick-lined symbols represent individuals captured in the wild, the numbers refer to the studbook number of the International (Chaparri, Nobody) or European (others) Studbooks<sup>1-4</sup>. The names are the individual's house-name. "000" indicates that for these wild individuals no studbook number or name is recorded, but they were representative of their species for a captive breeding program. The breeding success was low in the 60s and 70s and therefore

108 none of the captive bred animals could be linked to these “000” making these most likely wild born  
 109 individuals, which are unlikely hybrids when they were included in a breeding program. Thus, none  
 110 of the studied individuals or their ancestors were species hybrids. The inbreeding coefficient for  
 111 Chaparri is only 0.0053, despite the apparent inbreeding of the ancestors.

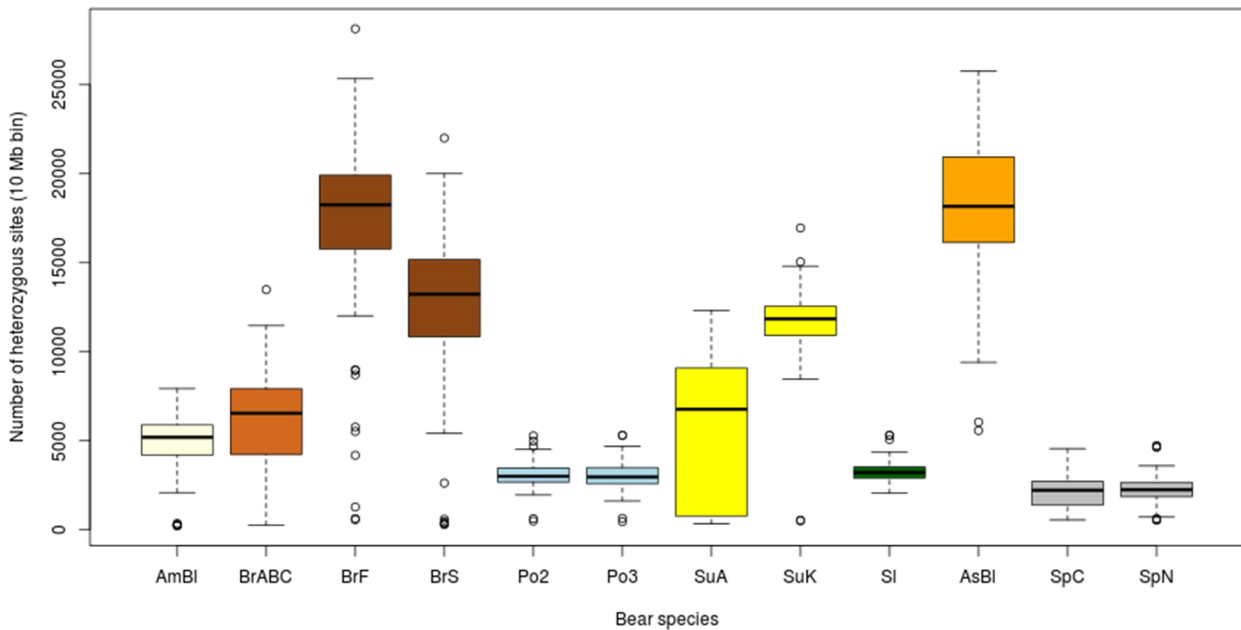

112  
 113 **Supplementary Fig. 4. Box plot showing the number of heterozygous sites in 10 Mb bins for**  
 114 **all bear genomes.** The x-axis shows the bear species and the y-axis depicts the absolute number of  
 115 heterozygous sites per 10 Mb fragment. AmBl: American black bear, BrABC: Brown bear ABC,  
 116 BrF: Brown bear -Finland, BrS: Brown bear -Sweden, Po2: Polar bear -2, Po3: Polar bear 3, SuA:  
 117 Sun bear- Anabell, SuK: Sun bear -Klaus, Sl: Sloth bear, AsBl: Asiatic black bear, SpC: Spectacled  
 118 bear- Chapparri and SpN: Spectacled bear – Nobody.

119  
 120  
 121  
 122  
 123  
 124

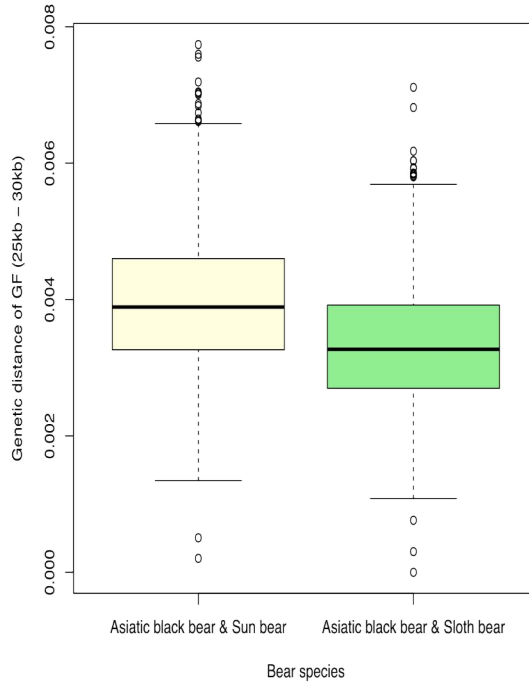

125  
 126  
 127  
 128  
 129  
 130  
 131  
 132  
 133  
 134  
 135  
 136  
 137  
 138  
 139  
 140  
 141  
 142  
 143  
 144  
 145  
 146  
 147  
 148  
 149  
 150  
 151  
 152

**Supplementary Fig. 5. Box plot of pair wise distances between the Asiatic black bear to sun bear and sloth bear for GFs 25-30 kb.** Each box represents the interquartile range with outliers. The average number of substitutions is about 104 bp per GF, with few outliers, indicating sufficient phylogenetic signal among bears for each fragment to distinguish alternative trees.

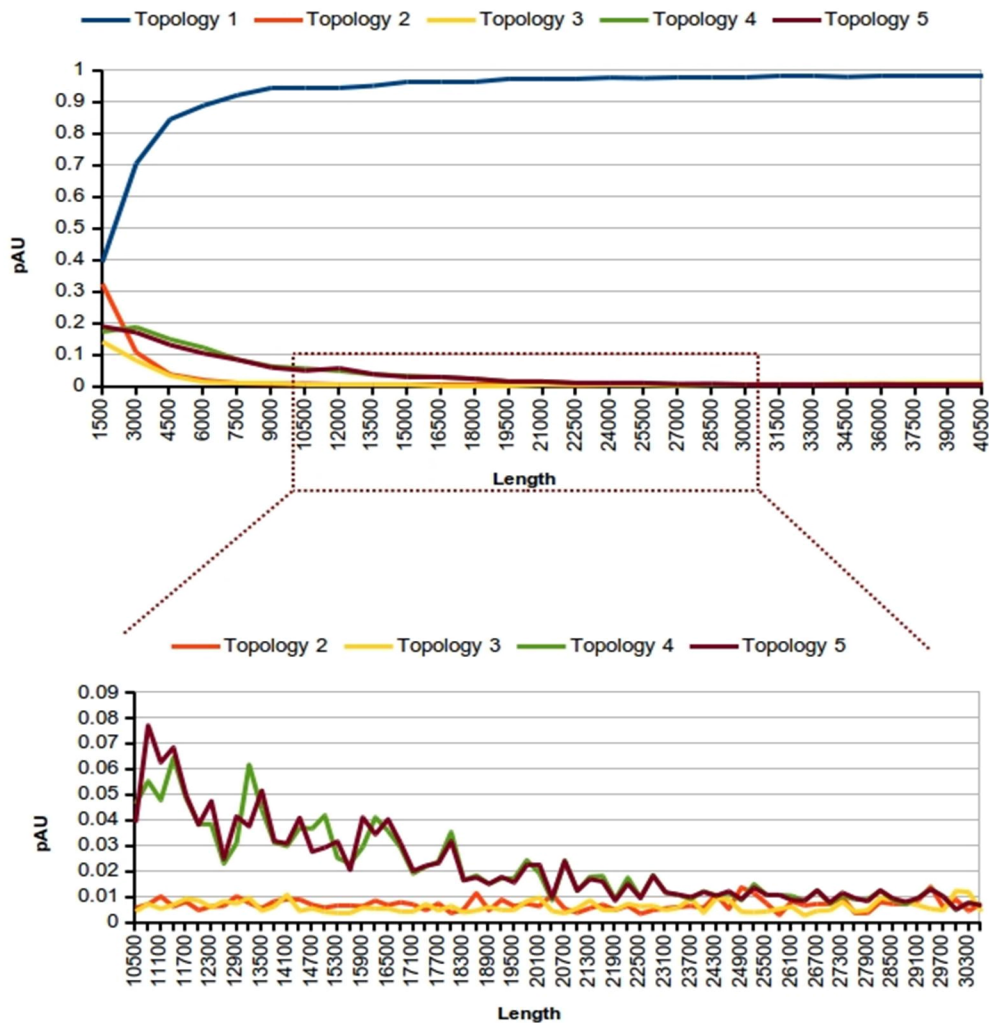

154 **Supplementary Fig. 6. Computer simulation to evaluate the length of GFs needed to**  
 155 **significantly support or reject a topology.** Five different topologies were tested. Based on the  
 156 parameters of the species tree (Topology 1, Fig 2A), data sets with increasing lengths were  
 157 simulated and the AU values calculated for the five topologies. Topology 2 (mtDNA tree), which is  
 158 the most deviating, and Topology 3 (American plus and Brown bear) is rejected rather quickly,  
 159 while the less deviant topologies “4” (Asiatic black bear and sloth bear as sister group and “5”  
 160 (Asiatic black bear and sun bear as sister group) require longer sequences to be rejected. pAU – AU  
 161 probability value.

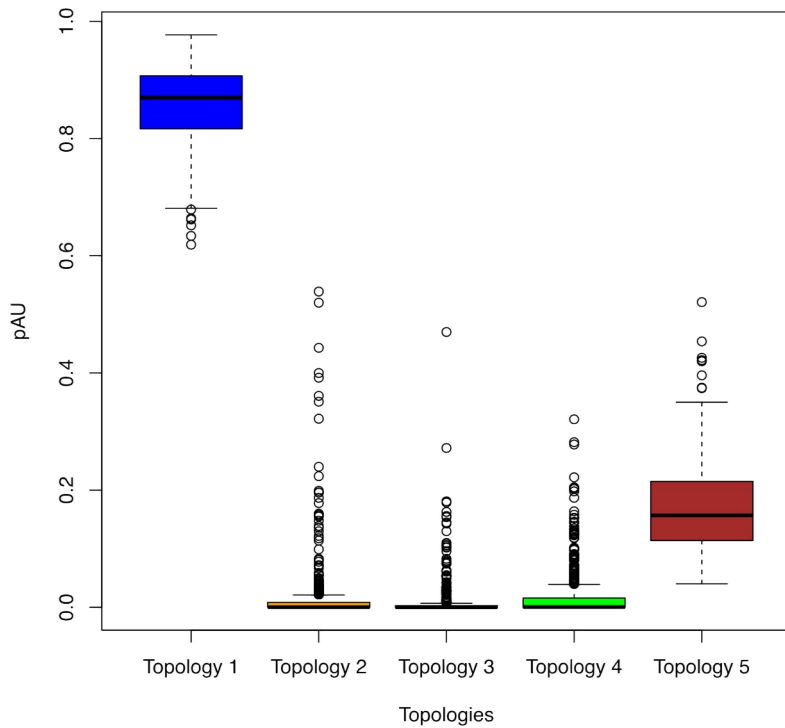

162

163

164 **Supplementary Fig. 7. Maximum likelihood test statistics (AU) of five topologies (see**  
 165 **Supplementary Fig. 6).** The analysis included 500 random GF data sets that reconstruct coalescent  
 166 species tree (Fig. 2A) as the best ML tree. Topology 1 received on average AU probabilities >0.85,  
 167 Topology 2, 3 and 4 are significantly rejected by nearly all data sets and Topology 5 cannot be  
 168 significantly rejected. Thus, the majority of GFs that support a particular tree do so in nearly all  
 169 cases with significant support. Topologies are given in Supplementary Fig. 6 legend. pAU – AU  
 170 probability value.

171

172

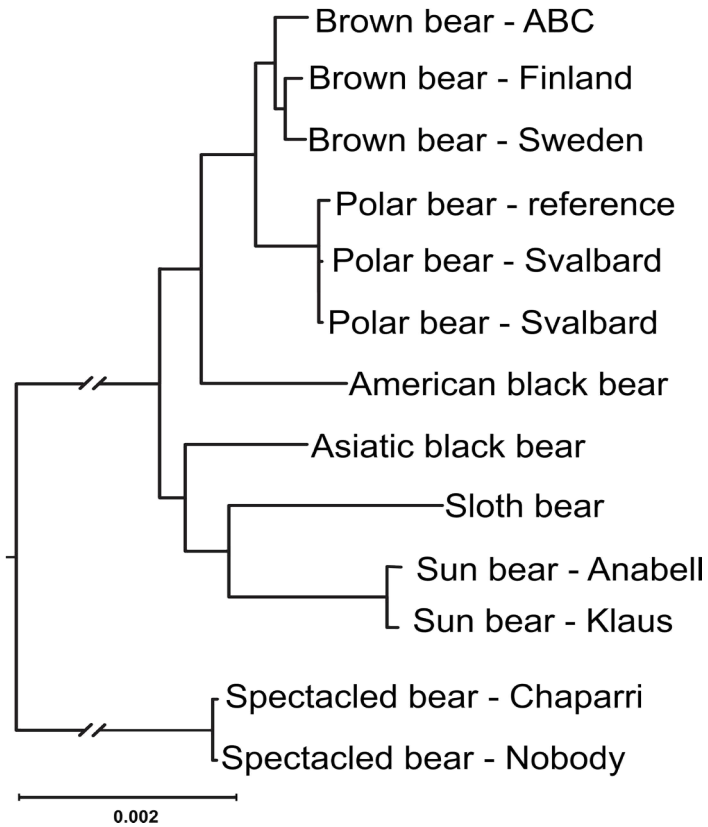

173

174

175 **Supplementary Fig. 8. Phylogenetic relationship among the bears using GFs.** The coalescent  
 176 species tree of 18,621 individual GFs >25 kb together with names or geographical origin of the  
 177 individual. All branches received 100% bootstrap support. The position of the root in the tree, as  
 178 well as the depicted branch lengths were calculated from 10 Mb of GF sequences. The scale bar  
 179 indicates 0.002 substitutions per site.

180

181



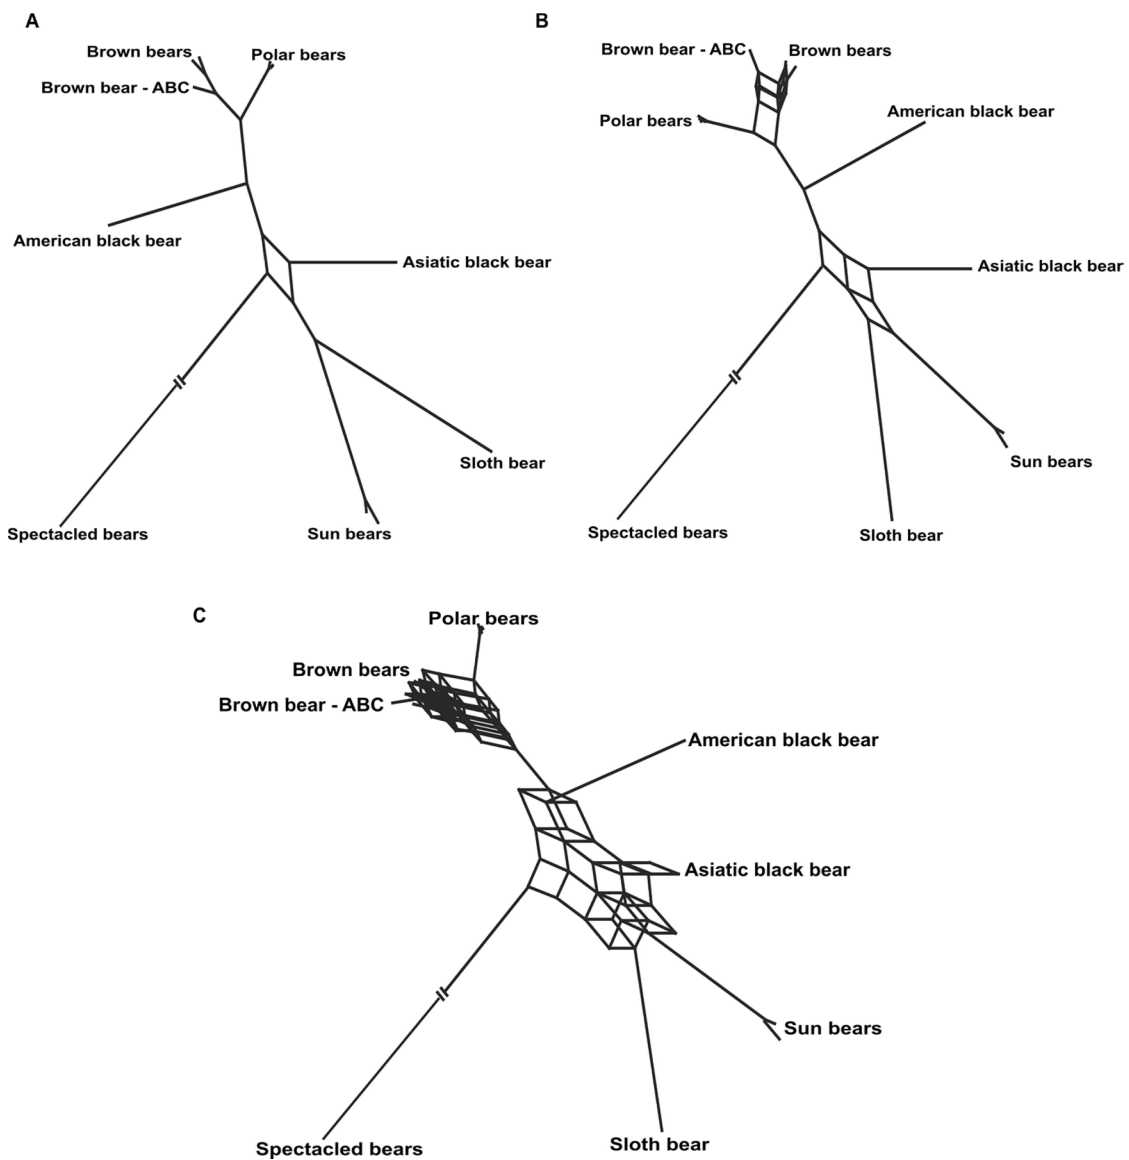

183 **Supplementary Fig. 9. Network analysis of 18,621 GF ML trees.** SplitsTree with thresholds at (A)  
 184 30%, (B) 10% and (C) 5%. At the 30% threshold the Asiatic black bear is either sister group to the  
 185 sun and sloth bear, or to the clade of American black, brown plus polar bear. It is evident from the  
 186 figure that signal is becoming increasingly complex with lower thresholds.

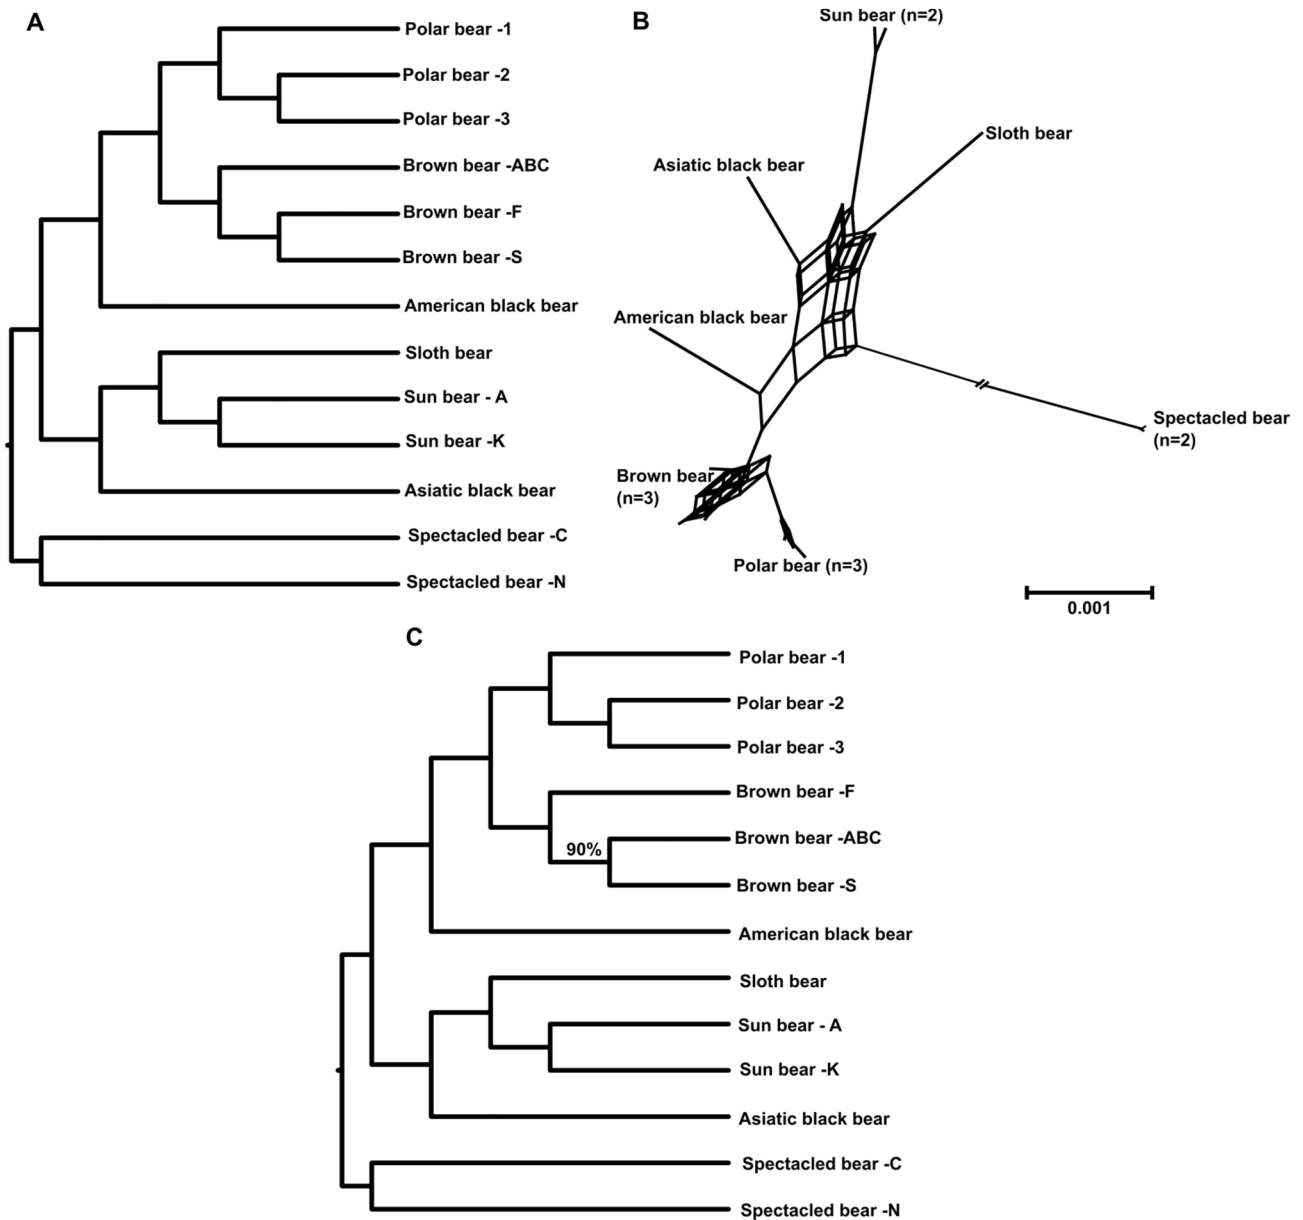

187 **Supplementary Fig. 10. The X chromosome species tree, X chromosome network, and coding**  
 188 **sequence species tree.** A) A coalescent species tree (cladogram) from 718 GF >1000bp (total 74Mb)  
 189 was constructed from X chromosome scaffolds identified by <sup>5</sup>. The tree is identical to that of Fig 2A.  
 190 B) The splits network from X chromosome data with 8% threshold is very similar to that for the  
 191 whole genome Fig 2B. C) The coalescent species tree from 8,050 protein coding genes (10,303,323  
 192 bp). Note that all branches are supported by 100% bootstrap support, except the one placing the  
 193 ABC-island brown bear. Giant panda as an outgroup is not shown. Brown bear-F: Brown bear -  
 194 Finland, Brown bear-S: Brown bear -Sweden, Sun-A: Sun bear- Anabell, Sun-K: Sun bear -Klaus,  
 195 Spectacled bear-C: Spectacled bear- Chappari and Spectacled bear-N: Spectacled bear – Nobody.  
 196 The scale bar indicates 0.001 substitutions per site.  
 197

198

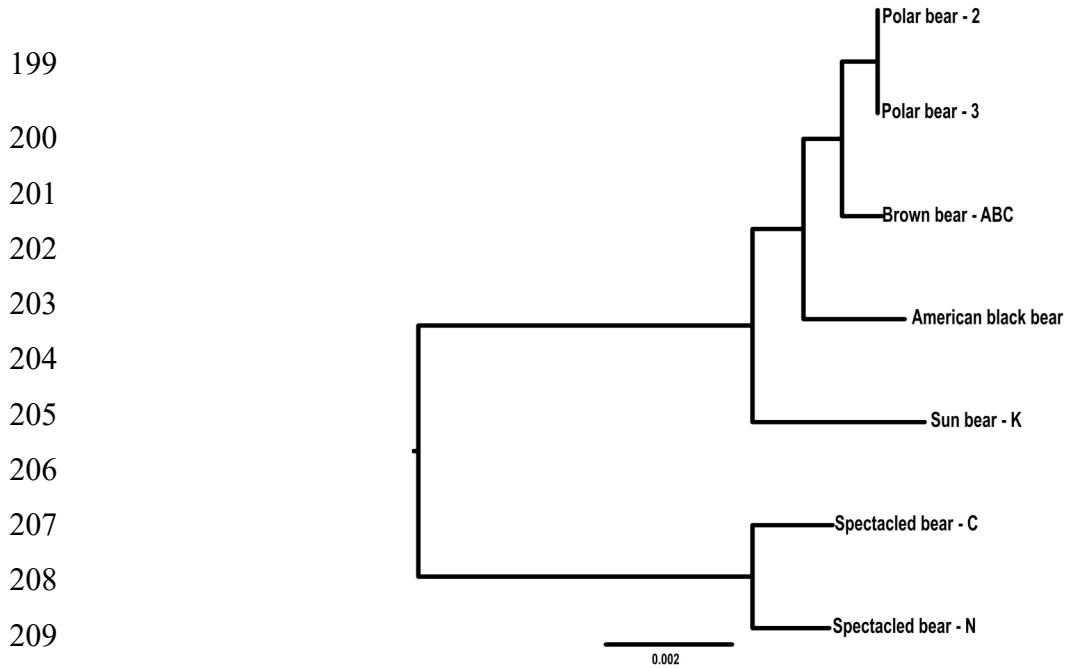

212 **Supplementary Fig. 11. A ML species tree reconstructed from 7.96 kb of Y chromosome**  
 213 **scaffolds.** The analysis is based on identified Y chromosome scaffolds <sup>6</sup> and all branches receive 100%  
 214 support. Only scaffolds which are *in vitro* validated or longer than 1 kb: Scaffold ID: 297, 301, 309,  
 215 318, 369, 389, 403, 579, 605, 646, 4889 and 6612 <sup>6</sup>, were used in the analysis. Names see  
 216 Supplementary Fig. 10. The scale bar indicates 0.002 substitutions per site.

217

218

219

220

221

222

223

224

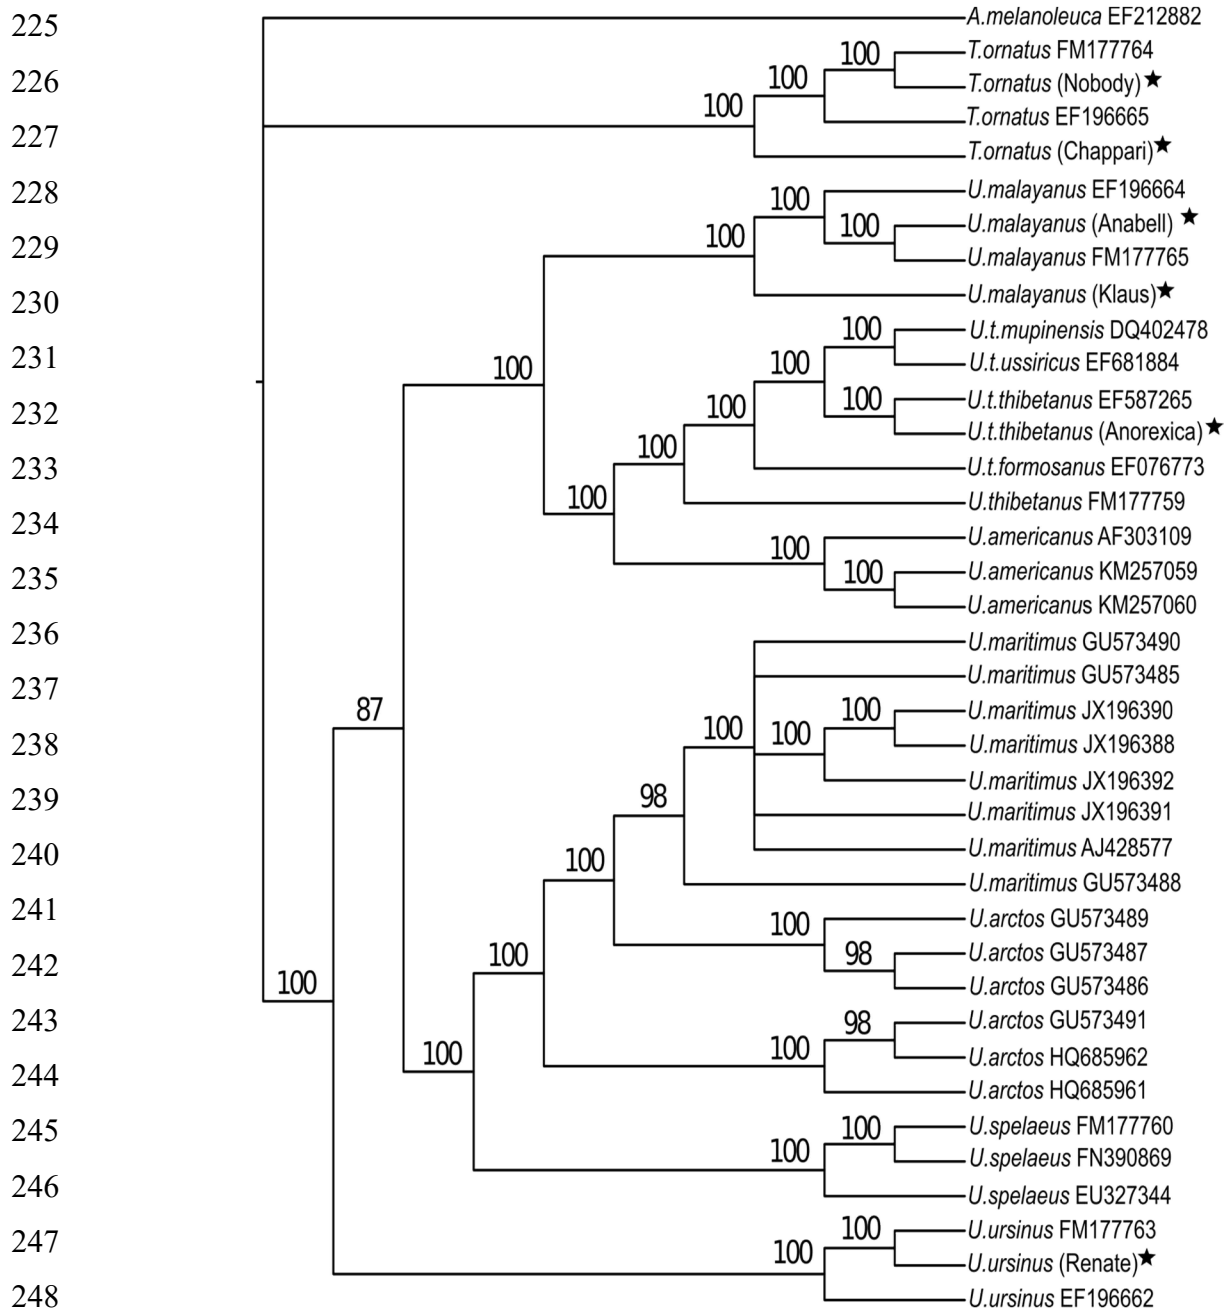

249 **Supplementary Fig. 12. Bayesian tree from complete mitochondrial genomes (11,529 bp**  
 250 **alignment) of 38 bears with species name and accession numbers.** The values on the branches  
 251 show the posterior probability values (x100). Binomial names with asterisk represent genomes new  
 252 to this study with their individual name in bracket. Note the limited support for placing the sloth  
 253 bears (*U. ursinus*) as sister group to all other ursine bears.

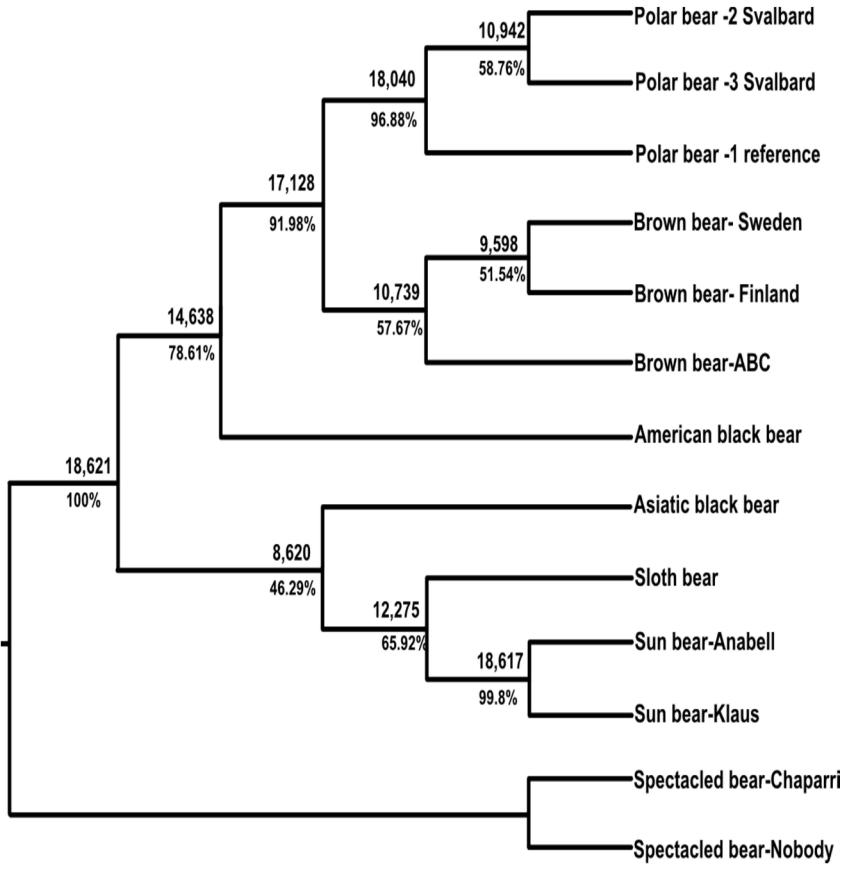

254

255 **Supplementary Fig. 13. A majority rule consensus tree from 18,621 individual GF ML trees**  
 256 **(Supplementary Table 3) calculated with the program consense of the Phylip package.** The  
 257 topology is congruent to the coalescent species tree. Number above each branches indicate the  
 258 absolute number of splits found in 18,621 individuals GF trees, the number below shows the  
 259 percentage values. The low support (46.3%) for placing the Asiatic black bear as the sister group to  
 260 the sun and sloth bear is congruent with the network analysis and gene flow analyses.

261

262

263

264

265

266

267

268

269

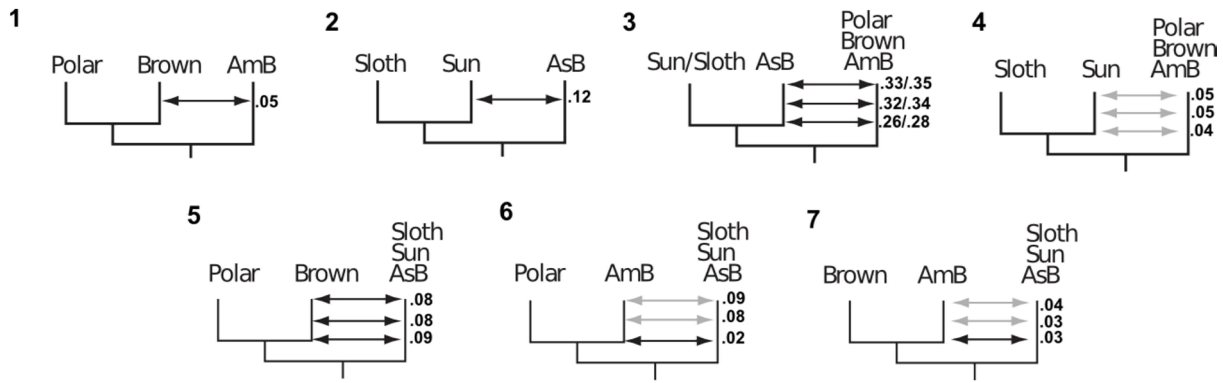

275

276 **Supplementary Fig. 14. Graphical summary of the D-statistics analyses (Supplementary Table**  
 277 **4).** The individual trees show gene flow for different combinations of ursine bears (Polar = Polar  
 278 bear-1, Brown = Brown bear-Finland, AmB = American black bear, AsB = Asiatic black bear, Sun =  
 279 Sun bear-Anabell, Sloth = Sloth bear). The *D*-values are shown next to black arrows that symbolize  
 280 gene flow between the respective species. Gray arrows symbolize possibly indirect or past gene-  
 281 flow, because the species habitats do currently not overlap, e.g. between American black bear and  
 282 sun and sloth bear. These species probably never overlapped in space and time, when the American  
 283 black bear became isolated on the American continent after the divergence of sun and sloth bear.  
 284 The topology numbers (1-7) is found in Supplementary Table 4.

285

286

287

288

289

290

291

292

293

294

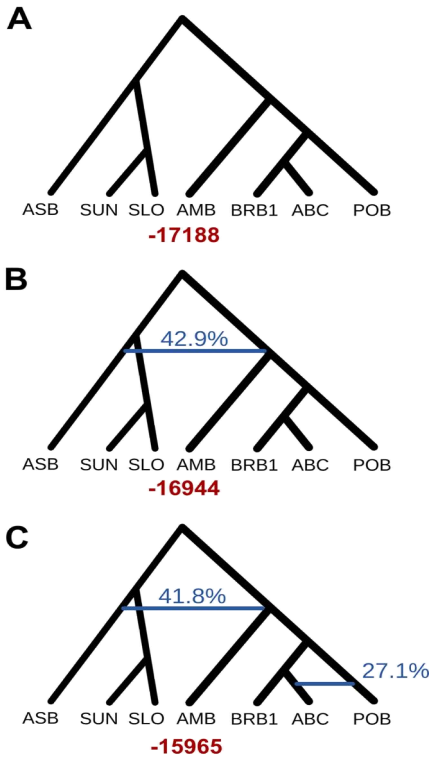

295

296 **Supplementary Fig. 15. PhyloNet analyses.** ML networks for 4000 putatively independent GF  
 297 trees (every fourth tree) generated by PhyloNet in runs allowing 0, 1 or 2 reticulations (A, B and C).  
 298 Reticulations are drawn in blue with inheritance probabilities. Exact log-likelihood values were  
 299 calculated and written in red below each network. The most prominent reticulation between Asiatic  
 300 black bear and the ancestor of American black, brown and polar bear is also the strongest found in  
 301  $D_{FOIL}$  analyses. It is obvious that allowing for reticulations (hybridizations) in the networks  
 302 improves the likelihood values. Only the two most prominent hybridizations are shown, because  
 303 increasing the number of allowed reticulations increases the computation time from days to months  
 304 or years. The PhyloNet analyses finds high probability for hybridization between ABC island brown  
 305 bears and polar bears, confirming earlier observations<sup>7,8</sup>. The prominent gene flow between Asiatic  
 306 black bear and the ancestor to American black, brown and polar bear is also detected confirming  
 307  $D_{FOIL}$  analyses (Table 1). PhyloNet probably detects hybridization in particular when gene flow is  
 308 concentrated in the genome and affects trees from GF, while  $D$ -statistics detects even a spread-out  
 309 signal, because it analyses all nucleotide differences in the ABBA/BABA statistics.

310

311

312

313

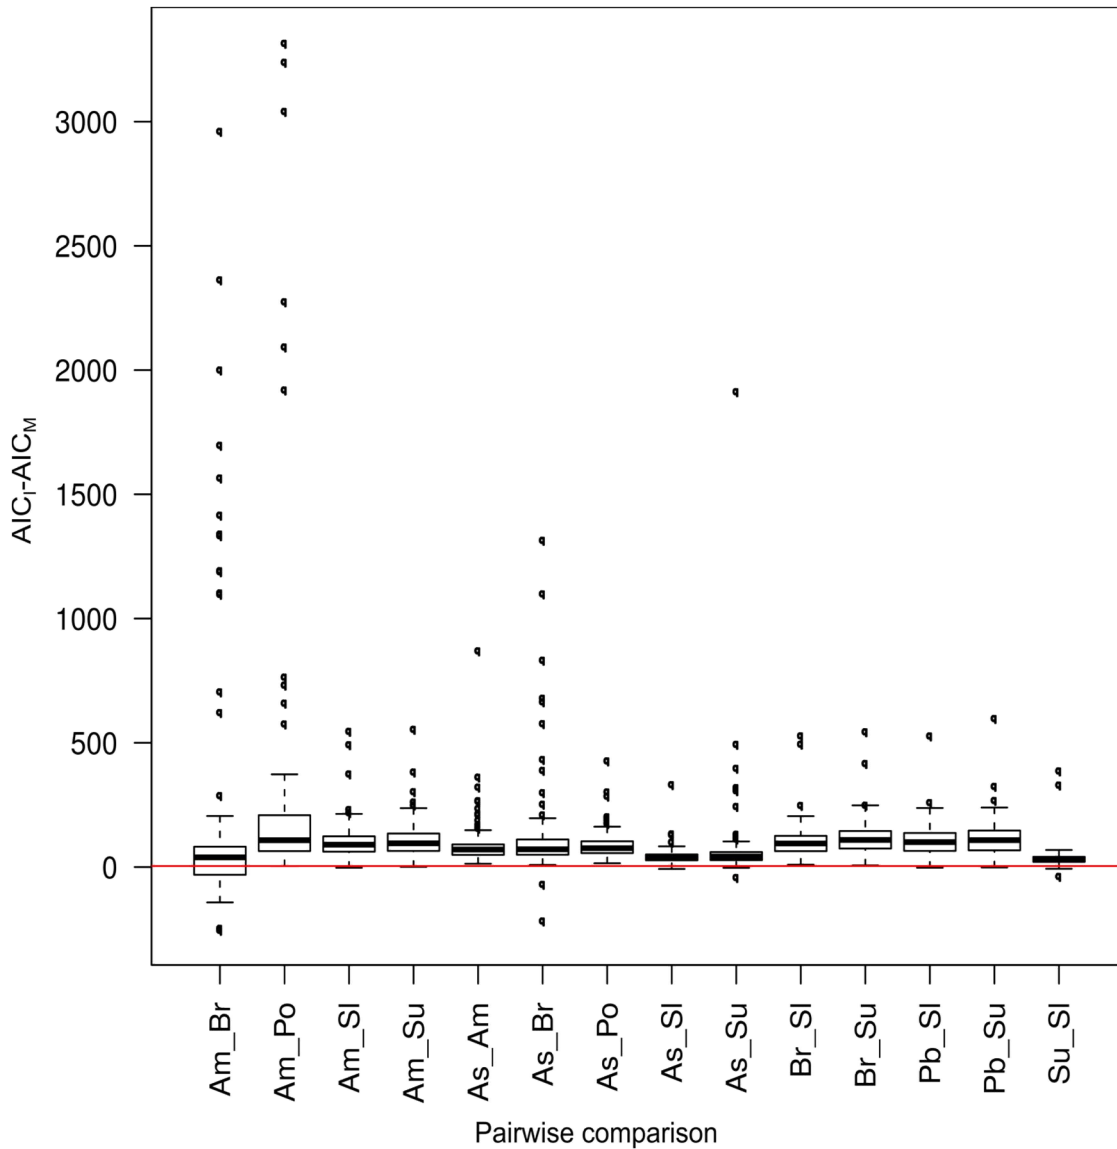

314  
 315 **Supplementary Fig. 16. CoalHMM analyses on pairwise species with gene flow.**

316 Box-plots of the distribution of the difference of AIC values under the isolation model and AIC  
 317 values for the isolation with migration model for different species pairs (separated by \_). Positive  
 318 AIC values show preference for the migration model while negative values favour the isolation  
 319 model. Many genomic fragments have negative AIC values, but a substantial number of fragments  
 320 have  $\Delta AICs$  above zero, thus significantly rejecting the isolation model. Am= American black bear,  
 321 As = Asiatic black bear, Br = brown bear, Sl = Sloth bear, Sun = Sun bear, Po = polar bear.

322  
 323



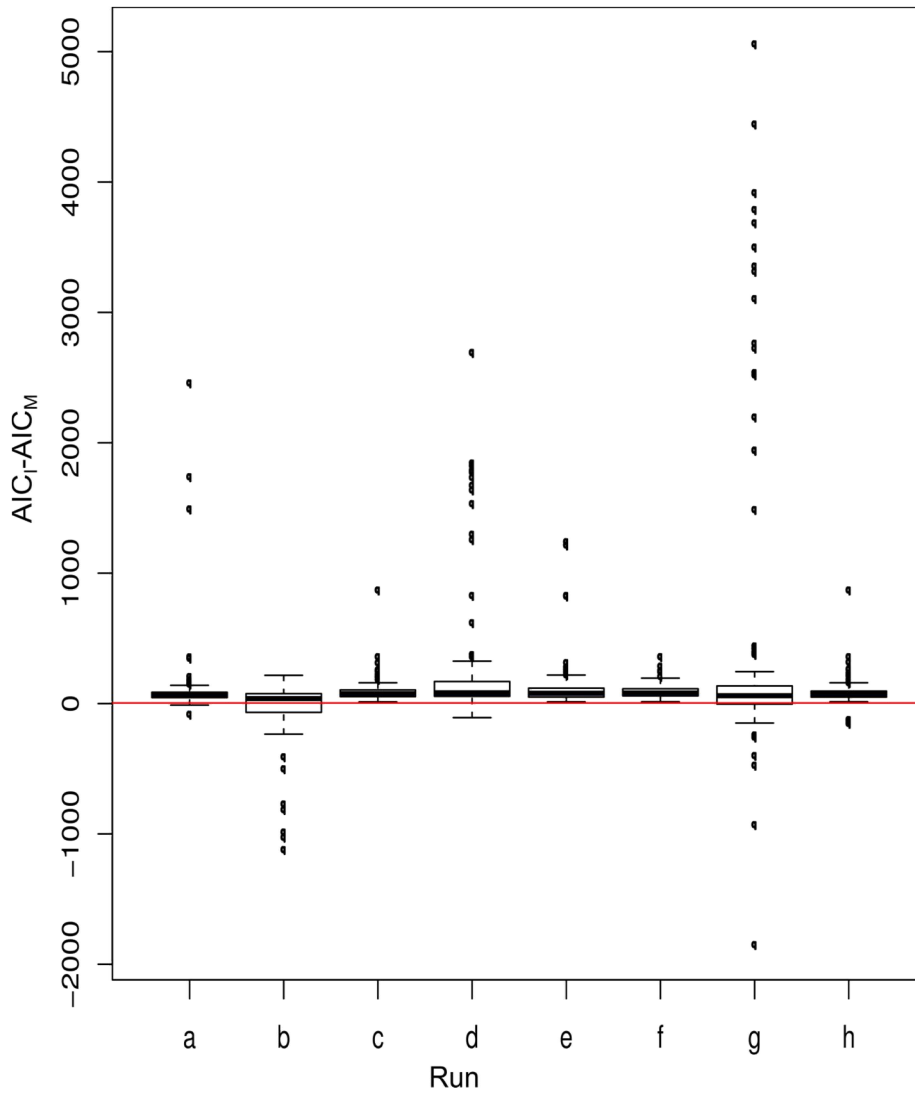

324

325 **Supplementary Fig. 17. CoalHMM sensitivity analysis.** Most population parameters are difficult  
 326 to precisely estimate, especially for past population sizes. The influence of unrealistically high or  
 327 low parameters are studied in a sensitivity analyses for the American black bear and Asiatic black  
 328 bear species pair. (a)  $N_e$  2,000, (b)  $N_e$  200,000, (c)  $N_a = 5 \times N_e$ , (d)  $\mu = 0.5e-9$ , (e)  $\mu = 2.0e-9$ ,  
 329 recombination rate (f) 0.1 and (g) 10 , migration time 8% of split time. The estimates are robust  
 330 over a broad range of parameters. The largest impact on the analyses, still with many genomic  
 331 fragments showing a positive signal, came from the (g) recombination rate parameter. This indicates  
 332 that the result of a migration model is insensitive over a wide range of parameters at least for a  
 333 substantial part of the genome.

334

335

336

337

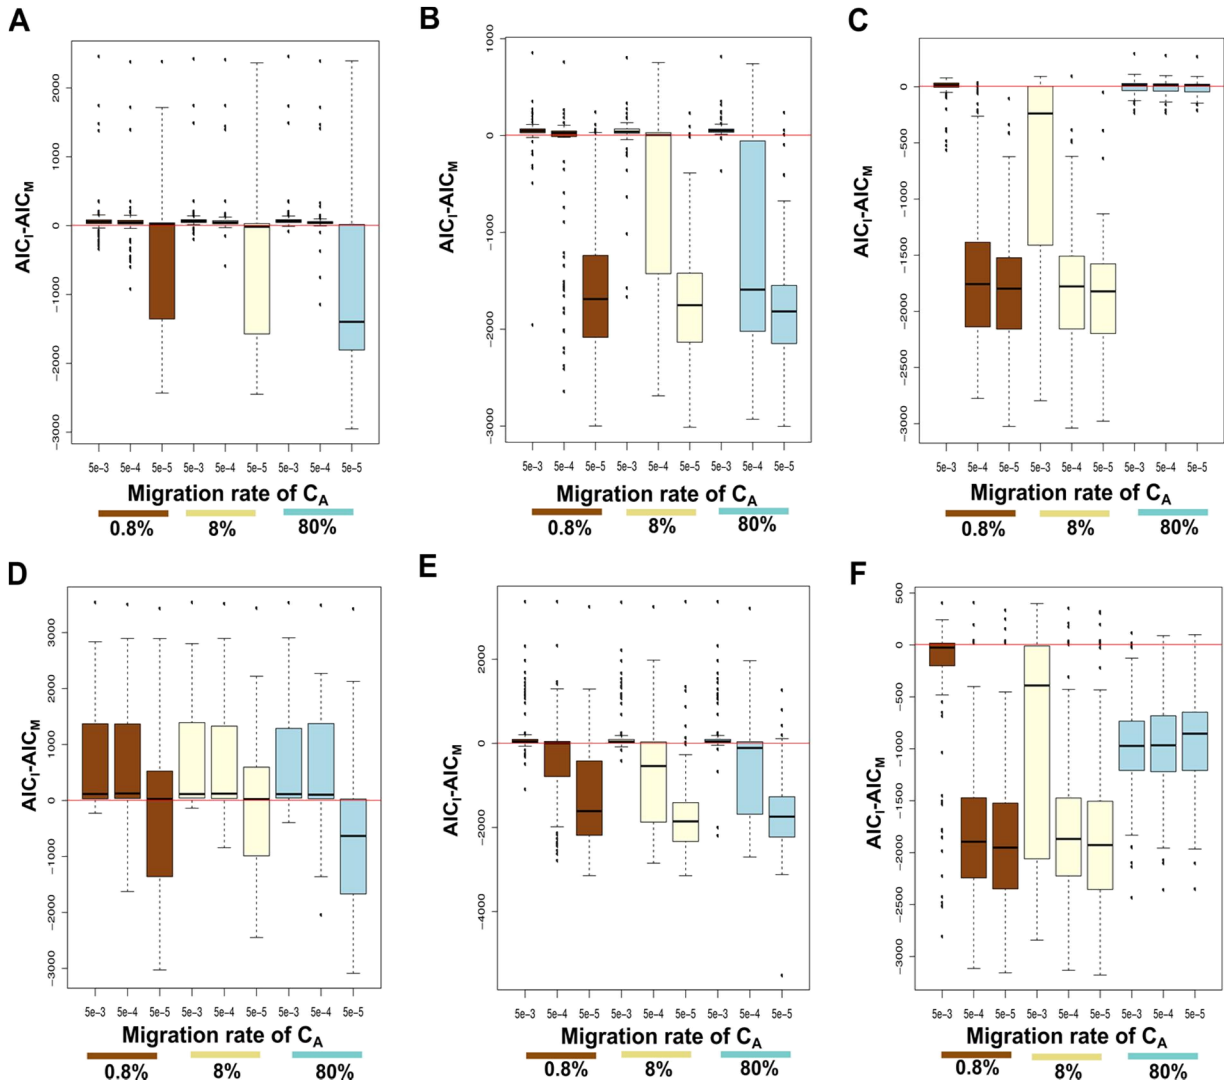

338

339

340 **Supplementary Fig. 18. Exploration of different parameters for the CoalHMM analyses.** Box  
 341 plots in A, B and C show the Asiatic and American black bear species pair with migration rate  
 342 values that are three orders of magnitude lower (0.005, 0.0005 and 0.00005 multiplied  $C_A$ ) than  
 343 described for other mammals<sup>9,10</sup>. These values are explored under an  $Ne$  of 2,000 (A), an  $Ne$  of  
 344 20,000 (B) and  $Ne$  of 200,000 (C), and migration times of 0.8% (brown), 8% (grey) and 80% (blue)  
 345 of the split time, other parameters are as described before (Supplementary Fig. 16). Box plots D, E  
 346 and F show the American and brown bear pairwise comparison with the parameters set as above. It  
 347 is evident that decreasing the migration rate reduces the number of genomic fragments supporting  
 348 the migration model. However, even at the lowest migration rates (representing  $\ll 0.01$  migrant per  
 349 generation) a non-negligible amount GFs supports the migration model.

350

351

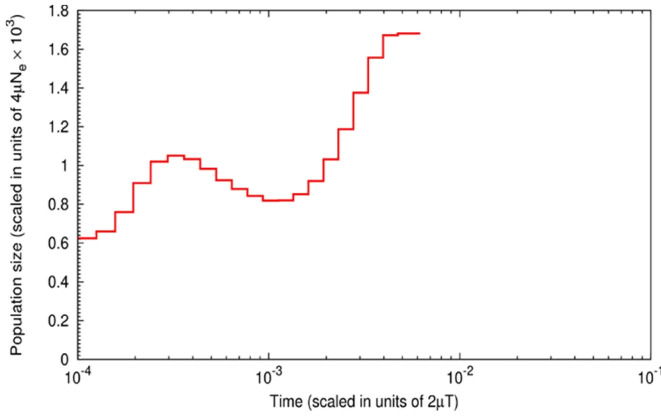

**Sun bear - Anabell**

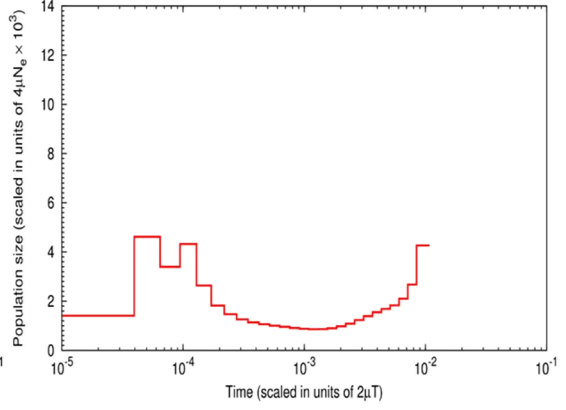

**Sun bear - Klaus**

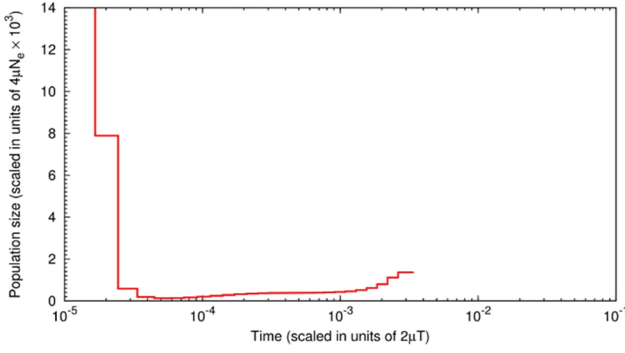

**Sloth bear**

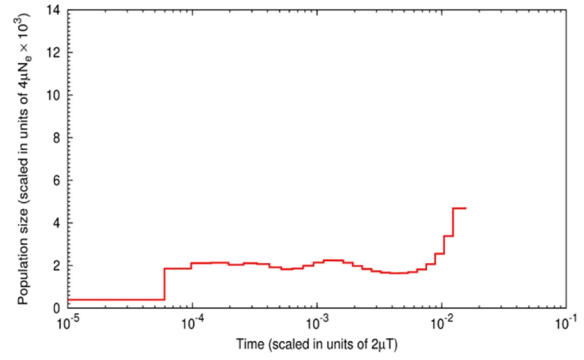

**Asiatic black bear**

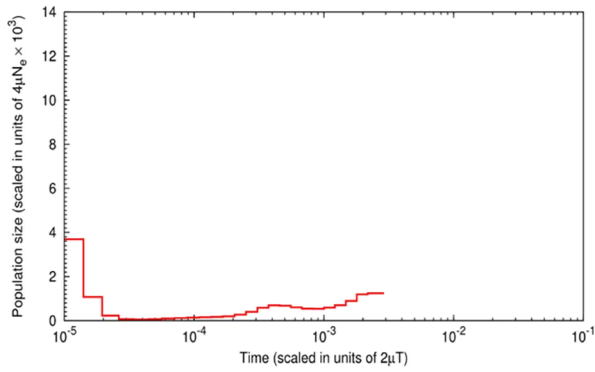

**Spectacled bear - Chaparri**

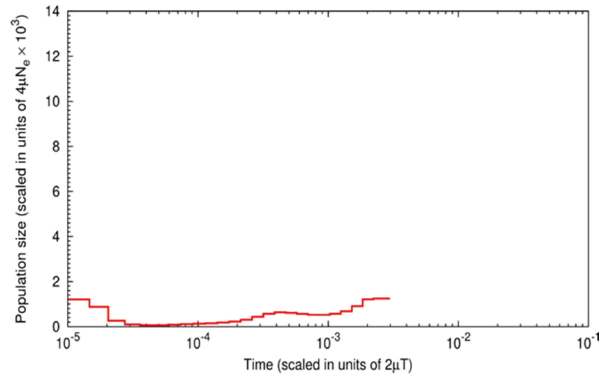

**Spectacled bear - Nobody**

352

353

354 **Supplementary Fig. 19. Unscaled pairwise Sequential Markovian Coalescent (PSMC) plots**

355 **used in this study.**

356

357

358

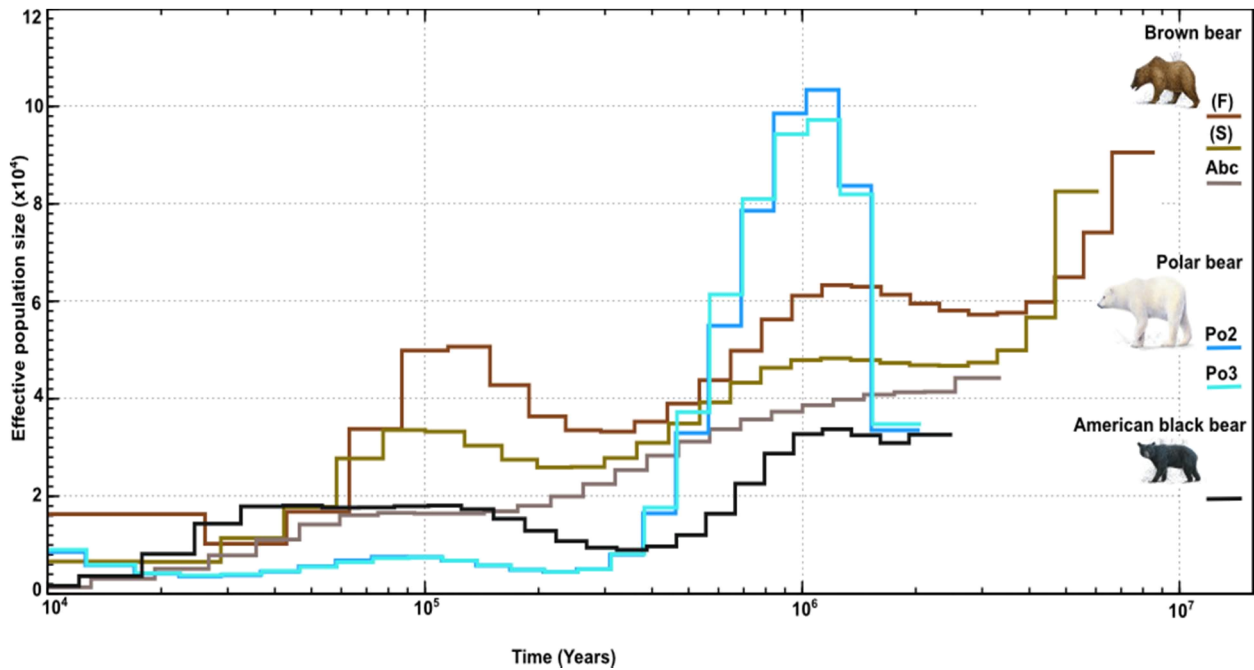

359

360

361 **Supplementary Fig. 20. Demographic history from polar, brown and American black bears**  
 362 **genomes used in this study.** Pairwise Sequential Markovian Coalescent (PSMC) analysis using the  
 363 mutation rate of  $1 \times 10^{-8}$  changes/site/generation with a generation time of 6 years. The bear  
 364 paintings were made by Jon Baldur Hlidberg ([www.fauna.is](http://www.fauna.is)).

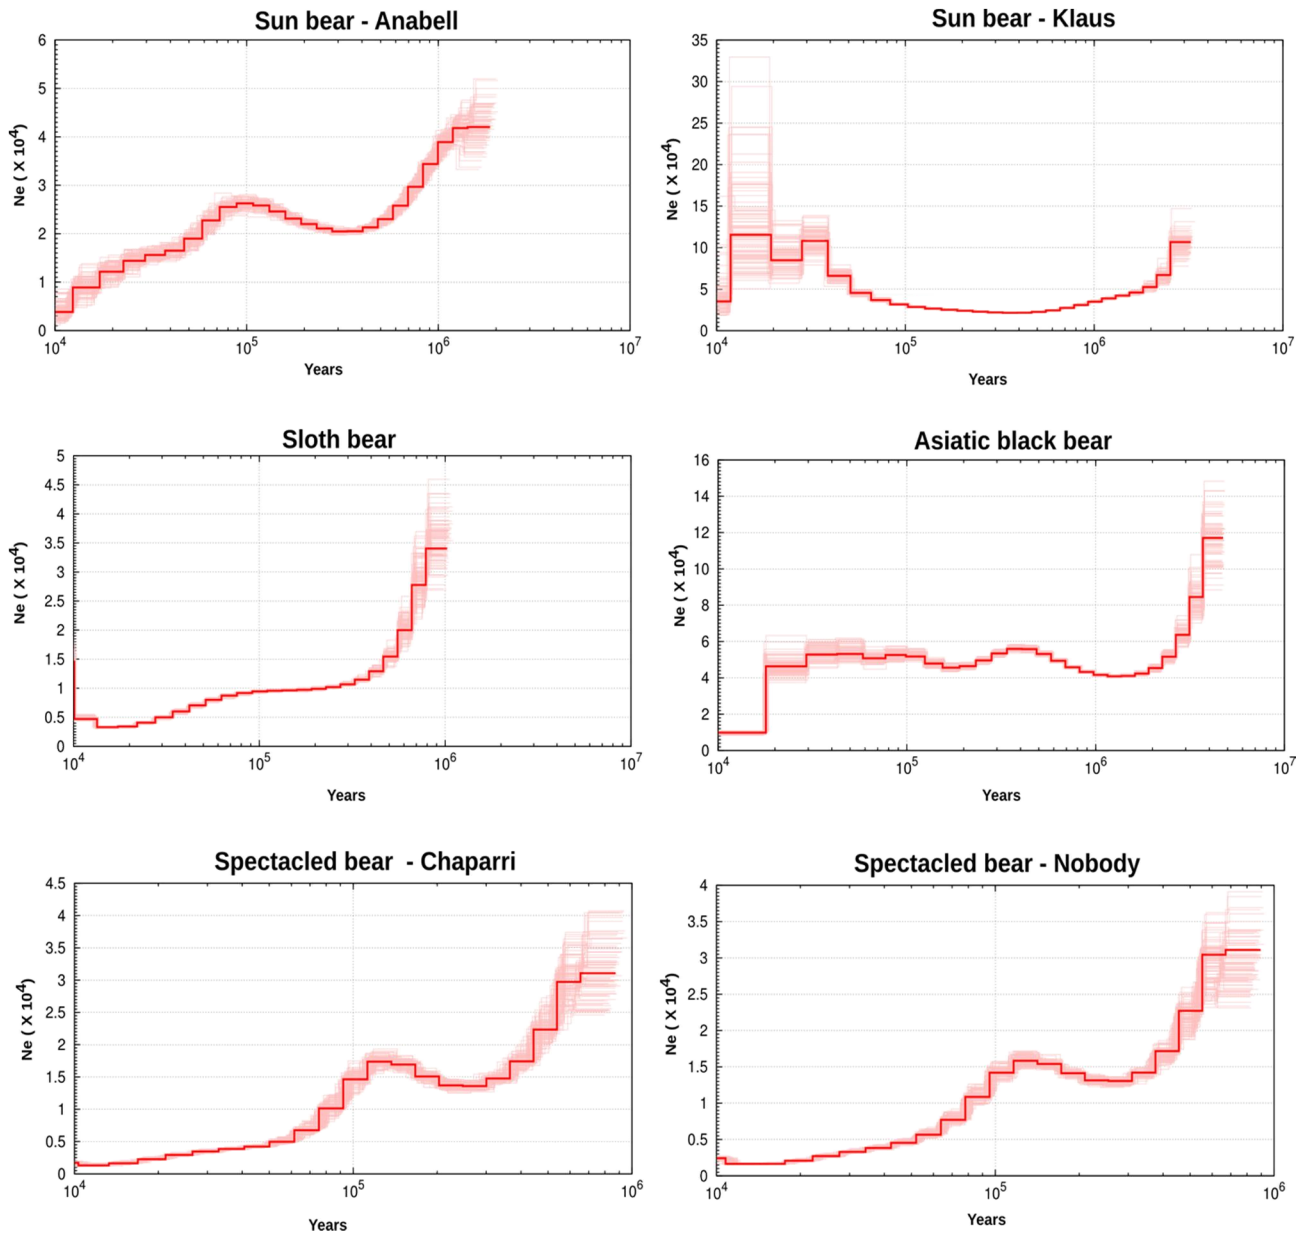

365

366

367 **Supplementary Fig. 21. Demographic history of the sequenced bear genomes.** Pairwise  
 368 Sequential Markovian Coalescent (PSMC) analysis using the mutation rate of  $1 \times 10^{-8}$   
 369 changes/site/generation with a generation time of 6 years. Light red lines summarize 100 bootstrap  
 370 replicates from the PSMC analysis.

371

372

373

374  
375

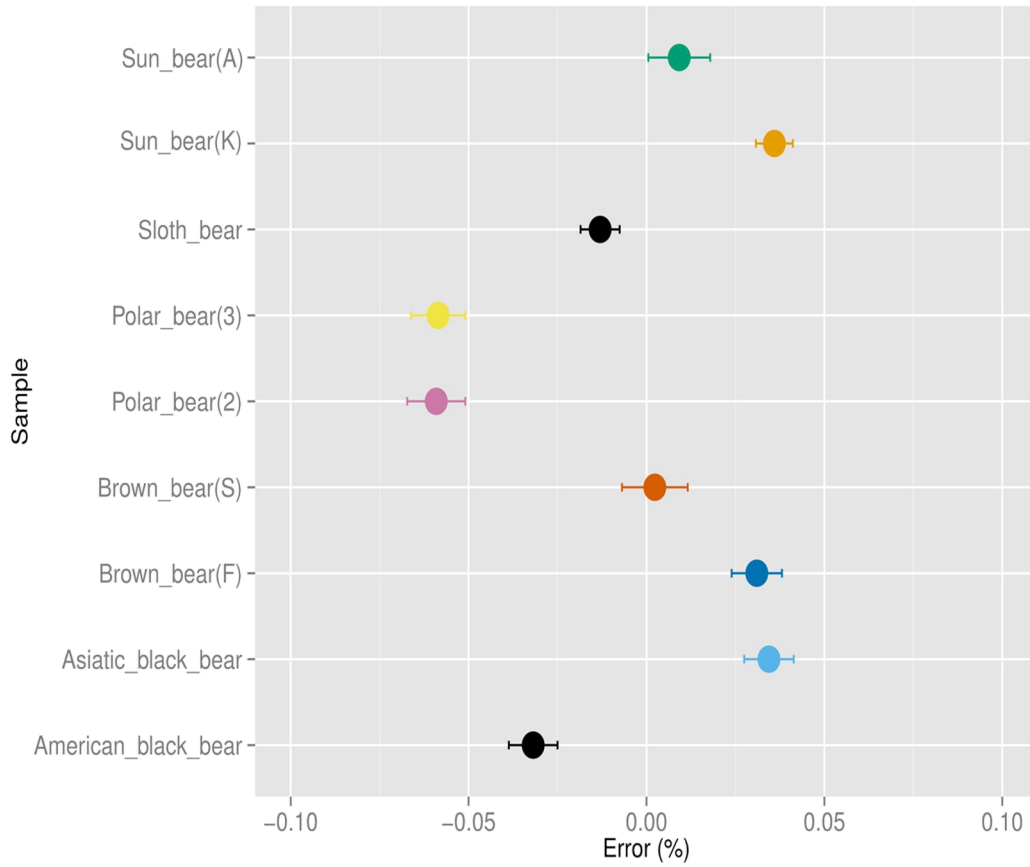

376 **Supplementary Fig. 22. Genome error rate analysis.** Mean error percentages for bear genomes  
377 calculated on 430 Mb sequence data. Error bars indicate 95% confidence intervals. Note, that  
378 depending on the excess of expected derived and expected ancestral alleles, the error rate can be  
379 negative or positive.

380  
381  
382  
383  
384  
385  
386  
387  
388  
389

390 **Supplementary Tables**

391

392 **Supplementary Table 1. Details of the available (published) and newly sequenced bear**  
 393 **genomes involved and analyzed in this study.** Binomial names with asterisk (\*) represent  
 394 genomes new to this study. Binomial name has been adopted according to reference<sup>11</sup> in this study.  
 395 F: female, M: male.

396

| Binomial name according to IUCN | Binomial name according to Nowak 1991 | Common name and identifier | Sex | SRA number / EBI Accession number          | Origin      | Individual Name / Stud-book number |
|---------------------------------|---------------------------------------|----------------------------|-----|--------------------------------------------|-------------|------------------------------------|
| <i>Ursus maritimus</i>          | <i>Ursus maritimus</i>                | Polar bear 1               | M   | n.a. (Reference genome)                    | n.a.        | n.a.                               |
| <i>Ursus maritimus</i>          | <i>Ursus maritimus</i>                | Polar bear 2               | M   | SRR518686, SRR518687                       | Svalbard    | n.a.                               |
| <i>Ursus maritimus</i>          | <i>Ursus maritimus</i>                | Polar bear 3               | M   | SRR518661, SRR518662                       | Svalbard    | n.a.                               |
| <i>Ursus arctos</i>             | <i>Ursus arctos</i>                   | Brown bear – ABC           | M   | SRR518717                                  | ABC-island  | n.a.                               |
| <i>Ursus arctos</i>             | <i>Ursus arctos</i>                   | Brown bear                 | F   | SRR935592, SRR935595, SRR935624, SRR935628 | Finland     | n.a.                               |
| <i>Ursus arctos</i>             | <i>Ursus arctos</i>                   | Brown bear                 | F   | SRR935591, SRR935625, SRR935627            | Sweden      | n.a.                               |
| <i>Ursus americanus</i>         | <i>Ursus americanus</i>               | American black bear        | M   | SRR518723                                  | Alaska      | n.a.                               |
| <i>Ursus thibetanus*</i>        | <i>Ursus thibetanus</i>               | Asiatic black bear         | F   | PRJEB9724                                  | Zoo Madrid  | Anorexica / 201                    |
| <i>Melursus ursinus*</i>        | <i>Ursus ursinus</i>                  | Sloth bear                 | F   | PRJEB9724                                  | Zoo Leipzig | Renate                             |
| <i>Helarctos malayanus*</i>     | <i>Ursus malayanus</i>                | Sun bear                   | F   | PRJEB9724                                  | Zoo Münster | Anabell / T1328                    |
| <i>Helarctos malayanus*</i>     | <i>Ursus malayanus</i>                | Sun bear                   | M   | PRJEB9724                                  | Zoo Madrid  | Klaus                              |
| <i>Tremarctos ornatus*</i>      | <i>Ursus ornatus</i>                  | Spectacled bear            | M   | PRJEB9724                                  | Zoo Basel   | Chaparri                           |
| <i>Tremarctos ornatus*</i>      | <i>Ursus ornatus</i>                  | Spectacled bear            | M   | PRJEB9724                                  | Zoo Basel   | Nobody                             |

397

398

399

400

401 **Supplementary Table 2. Sequencing and assembly statistics of all the analyzed bear**  
402 **individuals in this study.** The columns show the final number of reads used for the assembly with  
403 the number of raw and clean reads, the percentage of reads that were mapped, the initial mapping  
404 coverage and coverage after mark duplicates, and homo- and heterozygous SNVs sites called  
405 relative to polar bear reference genome. Common names with asterisk represent genomes new to  
406 this study.  
407

| Common name         | ID         | Raw reads (Million) | Cleaned reads (Million) | Mapped reads (%) | Initial coverage (X) | Final coverage (mark duplicates) (X) | Homozygous SNVs (Million) | Heterozygous SNVs (Million) |
|---------------------|------------|---------------------|-------------------------|------------------|----------------------|--------------------------------------|---------------------------|-----------------------------|
| Polar bear          | 2          | 351.5               | 336.8                   | 97.4             | 13.9                 | 13.4                                 | 0.6                       | 0.7                         |
| Polar bear          | 3          | 358.1               | 343.4                   | 96.1             | 13.8                 | 13.5                                 | 0.6                       | 0.7                         |
| Brown bear          | Finland    | 686.3               | 637.6                   | 95.7             | 23.9                 | 22.3                                 | 5.0                       | 3.9                         |
| Brown bear          | Sweden     | 669.5               | 615.3                   | 74.0             | 18.1                 | 15.8                                 | 4.9                       | 2.7                         |
| Brown bear-ABC      | ABC-island | 1122.1              | 1022.1                  | 97.3             | 38.7                 | 29.1                                 | 3.8                       | 1.3                         |
| American black bear | Alaska     | 891.8               | 832.2                   | 96.0             | 30.7                 | 21.1                                 | 8.4                       | 1.1                         |
| Asiatic black bear* | Anorexica  | 338.9               | 317.9                   | 95.9             | 11.4                 | 11.0                                 | 9.4                       | 4.1                         |
| Sloth bear*         | Renate     | 301.7               | 285.9                   | 96.0             | 10.5                 | 9.9                                  | 13.2                      | 0.8                         |
| Sun bear*           | Anabell    | 301.1               | 286.0                   | 95.6             | 10.4                 | 10.1                                 | 12.8                      | 1.3                         |
| Sun bear*           | Klaus      | 328.6               | 311.0                   | 96.0             | 11.3                 | 10.9                                 | 12.1                      | 2.6                         |
| Spectacled bear*    | Chaparri   | 325.4               | 307.2                   | 96.2             | 11.1                 | 10.8                                 | 27.1                      | 0.5                         |
| Spectacled bear*    | Nobody     | 319.2               | 301.3                   | 96.3             | 10.9                 | 10.5                                 | 27.0                      | 0.5                         |

408

409

410

411

412

413

414

415

416

417



418

419

420

421 **Supplementary Table 3. A majority rule consensus analysis of 18,621 individual GF ML-trees.**

422 Only splits occurring more than 1% are shown.

| Splits included in the consensus tree |                           |                           |
|---------------------------------------|---------------------------|---------------------------|
| Ranking                               | Splits (species in order) | Number of times occurring |
| 1                                     | *****. **                 | 18621                     |
| 2                                     | ..... **                  | 18617                     |
| 3                                     | ... *** . ...             | 18040                     |
| 4                                     | .. ***** . ...            | 17128                     |
| 5                                     | .. ***** . ...            | 14638                     |
| 6                                     | * ..... **                | 12275                     |
| 7                                     | ... * * . ...             | 10942                     |
| 8                                     | ... * * * . ...           | 10739                     |
| 9                                     | ... * * . ...             | 9598                      |
| 10                                    | ** ..... **               | 8620                      |
| Splits NOT included in consensus tree |                           |                           |
| 1                                     | ***** . ...               | 7086                      |
| 2                                     | ..... **** . ...          | 4683                      |
| 3                                     | ... ** . ...              | 3844                      |
| 4                                     | ... * * . ...             | 3785                      |
| 5                                     | ..... ** . ...            | 3616                      |
| 6                                     | * ..... **                | 3474                      |
| 7                                     | ... * * * . ...           | 3023                      |
| 8                                     | * ***** . ...             | 1609                      |
| 9                                     | ** ..... . ...            | 1394                      |
| 10                                    | ... * **** . ...          | 1188                      |
| 11                                    | ... ***** . ...           | 1109                      |
| 12                                    | ... ***** . ...           | 1096                      |
| 13                                    | ... * * * . ...           | 959                       |
| 14                                    | ***** **                  | 954                       |
| 15                                    | *** ..... **              | 904                       |
| 16                                    | ... **** . ...            | 769                       |
| 17                                    | * ***** . ...             | 658                       |
| 18                                    | ** ..... . ...            | 642                       |
| 19                                    | ***** . ...               | 621                       |
| 20                                    | ** ***** **               | 515                       |
| 21                                    | .. * * * . ...            | 503                       |
| 22                                    | .. * * * * . ...          | 480                       |
| 23                                    | * * ..... **              | 467                       |
| 24                                    | .. ***** **               | 299                       |
| 25                                    | * * ..... . ...           | 246                       |
| 26                                    | .... * * . ...            | 212                       |

423

424 Note – The table summarizes the results from the consense analysis <sup>12</sup>. The ranking is according to the number of  
425 occurrences of splits. Only splits occurring more frequent than 1% are shown. In each vertical column dots (.) and  
426 asterisks (\*) represents one individual and its split into the respective group (. or \*). The species order in the row of dots  
427 (.) and asterix (\*) is as follows: 1<sup>st</sup> Sloth bear, 2<sup>nd</sup> Asiatic black bear, 3<sup>rd</sup> American black bear, 4<sup>th</sup> Brown bear-Sweden, 5<sup>th</sup>  
428 Brown bear-Finland, 6<sup>th</sup> Polar bear-1, 7<sup>th</sup> Polar bear-2, 8<sup>th</sup> Polar bear-3, 9<sup>th</sup> Brown bear-ABC, 10<sup>th</sup> Spectacled bear-  
429 Nobody, 11<sup>th</sup> Spectacled bear-Chaparri, 12<sup>th</sup> Sun bear-Anabell, 13<sup>th</sup> Sun bear-Klaus. For example: row one

430 (\*\*\*\*\* .\*\*) has species 10 (spectacled bear Nobody) and species 11 (spectacled bear-Chaparrí) as the most  
431 frequent split (..) against all others (\*\*\*\*\*), row two (..... \*\*) has species 12, (sun bear-Klaus) plus species  
432 13 (sun bear-Anabell) as the second most frequent split (\*\*) with 18617 occurrences. One can deduce that in four  
433 occurrences they have not been placed together, but one of them grouped with another individual. This is not shown,  
434 because such an occurrence was less than 1%. The total number of splits exceeds 400. Row 3 groups the three polar  
435 bears (\*\*), row 4 shows the split of the polar bears plus two of the brown bears, and so on. This way all  
436 bifurcations (splits) are shown. Splits that occur less often than 50% are not shown in Supplementary Fig.13. As such, a  
437 split that shows the Asiatic black bear plus the American black bear, the brown and polar bears is not shown, but there is  
438 phylogenetic signal from 7,086 GF from ILS or gene flow for this grouping (see first row “Splits NOT included in  
439 consensus tree”). This is consistent with the unstable placement of the Asiatic black bear in most other analyses  
440 and strong gene flow that is detected between them.

441  
442  
443  
444  
445  
446  
447  
448  
449  
450  
451  
452  
453  
454  
455  
456  
457  
458  
459  
460  
461  
462  
463  
464  
465  
466  
467  
468  
469  
470  
471  
472  
473  
474  
475  
476

477 **Supplementary Table 4. Significant *D*-statistic values for the selected bear species using the**  
478 **spectacled bear as outgroup.** All combinations were considered, with ABBA-BABA counts, *D*-  
479 statistics ratio with jackknife estimates, standard error and Z-Score (significant if  $> |3|$ ). It is evident  
480 that we find significant gene flow between all the bear species. The triplets for which gene flow is  
481 indicated are numbered (#) and depicted in supplementary fig. S14. In all other cases comparisons  
482 are made that are in conflict with the species tree, thus showing a phylogenetic rather than a gene-  
483 flow signal. A negative value of *D*-statistics shows that H1 is closer to H3 than H2 is and a positive  
484 value shows that H2 is closer to H3 than H1 is.  
485

| # | H1                  | H2                  | H3                  | nABBA     | nBABA     | Dstat  | jackEst | SE      | Z       |
|---|---------------------|---------------------|---------------------|-----------|-----------|--------|---------|---------|---------|
| 1 | Polar bear          | Brown bear          | American black bear | 638,073   | 581,523   | 0.046  | 0.046   | 0.00280 | 16.575  |
| 2 | Sun bear            | Sloth bear          | Asiatic black bear  | 817,080   | 1,054,339 | -0.127 | -0.127  | 0.00261 | -48.523 |
| 3 | Sloth bear          | Asiatic black bear  | Brown bear          | 1,399,921 | 685,682   | 0.342  | 0.342   | 0.00237 | 144.417 |
| 3 | Sloth bear          | Asiatic black bear  | Polar bear          | 1,347,365 | 653,305   | 0.347  | 0.347   | 0.00241 | 143.651 |
| 3 | Sun bear            | Asiatic black bear  | Brown bear          | 1,307,028 | 668,618   | 0.323  | 0.323   | 0.00238 | 135.969 |
| 3 | Sun bear            | Asiatic black bear  | Polar bear          | 1,255,985 | 637,545   | 0.327  | 0.327   | 0.00243 | 134.171 |
| 3 | Sloth bear          | Asiatic black bear  | American black bear | 1,321,219 | 736,652   | 0.284  | 0.284   | 0.00249 | 113.880 |
| 3 | Sun bear            | Asiatic black bear  | American black bear | 1,232,896 | 716,199   | 0.265  | 0.265   | 0.00246 | 107.680 |
| 4 | Sun bear            | Sloth bear          | Polar bear          | 686,930   | 761,829   | -0.052 | -0.052  | 0.00223 | -23.227 |
| 4 | Sun bear            | Sloth bear          | Brown bear          | 716,312   | 791,448   | -0.050 | -0.050  | 0.00219 | -22.716 |
| 4 | Sun bear            | Sloth bear          | American black bear | 731,653   | 799,050   | -0.044 | -0.044  | 0.00221 | -19.880 |
| 5 | Polar bear          | Brown bear          | Asiatic black bear  | 590,580   | 492,405   | 0.091  | 0.091   | 0.00204 | 44.412  |
| 5 | Polar bear          | Brown bear          | Sloth bear          | 496,853   | 419,398   | 0.085  | 0.085   | 0.00223 | 37.843  |
| 5 | Polar bear          | Brown bear          | Sun bear            | 506,198   | 427,910   | 0.084  | 0.084   | 0.00231 | 36.216  |
| 6 | Polar bear          | American black bear | Sun bear            | 869,012   | 731,739   | 0.086  | 0.086   | 0.00240 | 35.728  |
| 6 | Polar bear          | American black bear | Sloth bear          | 857,657   | 712,872   | 0.092  | 0.092   | 0.00239 | 38.516  |
| 6 | Polar bear          | American black bear | Asiatic black bear  | 944,040   | 907,709   | 0.020  | 0.020   | 0.00207 | 9.487   |
| 7 | American black bear | Brown bear          | Sloth bear          | 765,121   | 832,022   | -0.042 | -0.042  | 0.00241 | -17.368 |
| 7 | American black bear | Brown bear          | Asiatic black bear  | 973,063   | 910,762   | 0.033  | 0.033   | 0.00212 | 15.636  |

|   |                     |            |          |         |         |        |        |         |         |
|---|---------------------|------------|----------|---------|---------|--------|--------|---------|---------|
| 7 | American black bear | Brown bear | Sun bear | 785,215 | 843,628 | -0.036 | -0.036 | 0.00243 | -14.733 |
|---|---------------------|------------|----------|---------|---------|--------|--------|---------|---------|

486

487 Note – Polar bear is Polar bear-2, Brown bear is brown bear-Finland, Sun bear is Sun bear-Anabell

488

489 **Supplementary Table 5. Significant D-statistics among ABC brown and polar and also**  
 490 **between sloth and sun bear.** A negative value of D-statistics shows that H1 is closer to H3 than H2  
 491 is and a positive value shows that H2 is closer to H3 than H1 is. Z-Score is significant if  $> |3|$ .

492

493

| H1                  | H2              | H3           | nABBA   | nBABA   | Dstat  | jackEst | SE       | Z      |
|---------------------|-----------------|--------------|---------|---------|--------|---------|----------|--------|
| Brown bear- Finland | Brown bear -ABC | Polar bear-2 | 761,149 | 541,802 | 0.168  | 0.168   | 0.004772 | 35.271 |
| Sun bear -Anabell   | Sun bear- Klaus | Sloth        | 144,730 | 147,578 | -0.010 | -0.010  | 0.002690 | -3.622 |

494

495

496

497 **Supplementary Table 6. Significant D-statistics for the selected bear species using the giant**  
 498 **panda as outgroup.** A negative value of D-statistics shows that H1 is closer to H3 than H2 is. Z-  
 499 Score is significant if  $> |3|$ .

500

| H1         | H2                 | H3                 | nABBA     | nBABA     | Dstat  | jackEst | SE       | Z        | Z ( <i>Spectacled bear as out group</i> ) |
|------------|--------------------|--------------------|-----------|-----------|--------|---------|----------|----------|-------------------------------------------|
| Sun bear   | Sloth bear         | Asiatic black bear | 1,152,717 | 1,415,513 | -0.102 | -0.102  | 0.001204 | -84.953  | -48.523                                   |
| Sloth bear | Asiatic black bear | Sun bear           | 1,415,513 | 1,569,988 | -0.052 | -0.052  | 0.001361 | -37.990  | -27.008                                   |
| Sun bear   | Asiatic black bear | Sloth bear         | 1,152,717 | 1,569,988 | -0.153 | -0.153  | 0.001293 | -118.492 | -79.801                                   |

501 Note – Sun bear is Sun bear-Anabell

502

503

504

505

506

507

508

509 **Supplementary Table 7. Divergence time estimates in Ma using the MCMC tree program in**  
 510 **PAML based on 5.2 million bp coding sequences.**

511

| Splits                                                                      | Estimated Years (Ma) |
|-----------------------------------------------------------------------------|----------------------|
| Spectacled bear / Ursinae                                                   | 10.6 (6.7-13.0)      |
| Polar + brown + American black bear / Asiatic black bear + Sun + Sloth bear | 5.0 (4.5-6.0)        |
| Asiatic black bear / Sun + Sloth bear                                       | 4.4 (3.6-5.8)        |
| Sun / Sloth bear                                                            | 3.6 (2.4-5.6)        |
| American black bear / Polar + Brown bear                                    | 3.4 (2.0-4.7)        |
| Polar / Brown bear                                                          | 0.9 (0.6-1.1)        |
| Brown bear-ABC /Brown bear-F                                                | 0.5 (0.4-0.8)        |
| Sun bear / Sun bear                                                         | 0.7 (0.2-0.8)        |
| Brown bear-S/Brown bear-F                                                   | 0.3 (0.2-0.5)        |
| Polar bear-1 / Polar bear-2                                                 | 0.1 (0.1-0.3)        |
| Polar bear-2 /Polar bear-3                                                  | 0.1 (0.0- 0.2)       |

512

513

514

515

516

517

518

519

520

521

522

523

524

525

526

527

528

## 529 **Supplementary Methods**

### 530 **Topology testing**

531 The simulated sequences were produced by Seq-Gen version 1.3.3<sup>13</sup> using the species tree topology  
532 (Fig 2A) and ML branch lengths based on 10 Mb of random genomic data with parameters (Settings:  
533 -mGTR -g4 -i0.1 -n100). Increasingly longer simulated sequences were produced, starting at 300 bp,  
534 and using 300 bp increments for sequences with lengths of up to 40,500 bp. Five different  
535 topologies were selected for statistical evaluation using the two different methods of simulation and  
536 real genomic data sets analyses (Supplementary Fig. 6). The sequences were analyzed by using the  
537 RAxML version 8.2.4<sup>14</sup> and AU probabilities were calculated using CONSEL version 1.20<sup>15</sup> using  
538 the GTR+G+I<sup>16</sup> model of sequence evolution. The best fitting substitution model was estimated  
539 using the jModelTest 2.1.1<sup>17</sup> on 10 Mb of random GFs available in RAxML version 8.2.4<sup>14</sup>. A  
540 second AU analysis was done on real genomic data by selecting 500 random GF that support the  
541 coalescent species tree (Fig 2A) as the best tree. The amount of substitutions that were contained in  
542 each GF was evaluated to make sure that there was sizeable genetic distance between the species for  
543 phylogenetic analysis.

544 In addition, to calculate the range of pairwise uncorrected genetic distance in the filtered  
545 GFs, pairwise uncorrected genetic distances between the three Asiatic bear species were calculated  
546 using custom perl scripts. The removal of TEs and simple repeats from the GF resulted in  
547 alignments of varying lengths, ranging between <5,000 to 80,000 nt (Supplementary Fig. 2). Model  
548 testing determined the GTR+G+I model of sequence evolution as the best fitting model available in  
549 RAxML version 8.2.4<sup>14</sup>. It was used in all subsequent phylogenetic ML analyses. The AU  
550 likelihood statistics of simulated GF sequences indicate that only alignments with a length >25 kb  
551 contain sufficient phylogenetic information to reject alternative trees. The mtDNA tree, which is the  
552 most different compared to the coalescent species tree, is significantly rejected already with 4,500

553 bp sequence length of nuclear DNA (Supplementary Fig. 6). Topologies that deviate less from the  
554 coalescent species tree, in particular those placing the Asiatic bear species in different positions  
555 requires sequence lengths of about 25 kb to be rejected. For that reason, data sets shorter than 25 kb  
556 were discarded from further phylogenetic analysis.

557 For natural reasons simulated data represent ideal datasets that are largely free of noise such  
558 as, ILS or gene flow. Therefore, these simulations define a lower bound of sequence length that is  
559 needed to reject alternative hypotheses. As a consequence, the selected size of the GFs represents a  
560 compromise to obtain sufficient phylogenetic information while still being short enough to  
561 minimize mixed phylogenetic signals from recombination. The typical size of non-recombining  
562 haplotype blocks is not yet known for the bear genomes, however it may be expected from the  
563 smaller effective population size in bears that it is larger than 11-22 kb as observed in humans<sup>18</sup>.  
564 The assumption that 25 kb contains enough phylogenetic signal, was further evaluated on 500 real  
565 GFs. The evaluation of real data with a length of 25,000 bp shows that most alternative topologies  
566 are significantly rejected by a AU analysis (Supplementary Fig. 6). However, it is evident from the  
567 plot that the GFs cannot reject all the topologies, especially topology 4 and topology 5  
568 (Supplementary Fig. 6) which differ only little from the species tree (Fig 2A). Thus, these GFs may  
569 still contain a mixed phylogenetic signal, which favors another alternative topology.

570 For resolving evolutionary questions, the amount of phylogenetic information (substitutions)  
571 per GF is crucial. The average number of 104 bp simple pairwise differences between the three  
572 Asiatic bears in 25-30 kb long GFs, gives an idea about the typical phylogenetic signal in GFs  
573 (Supplementary Fig. 5). Thus, these analyses show that GF of >25 kb contain sufficient  
574 phylogenetic signal to discriminate between topologies. This in stark contrast to the 1 kb fragments  
575 that were used in a recent study on primates (gibbons) where high recombination is known to have  
576 taken place<sup>19</sup>.

577 **Phylogenetic analysis of nuclear protein-coding genes and mitochondrial genomes**

578 The annotation of the polar bear genome<sup>20</sup> was used to extract the protein coding sequences (CDS)  
579 from the genome that could be used for phylogenetic analysis. The species alignments were  
580 complemented by giant panda (*Ailuropoda melanoleuca*, ailMel1) sequences from Ensembl  
581 (<http://www.ensembl.org/>) to provide an outgroup to the analyses. In order to determine orthologous  
582 CDS between the polar bear reference genome and the giant panda Proteinortho version 5.06<sup>21</sup> was  
583 used. The CDS of the new bear genomes that corresponded to the polar bear CDS were aligned with  
584 MAFFT version 7.154b<sup>22</sup>. Gaps were removed using Gblocks version 0.91b<sup>23</sup> and a custom perl  
585 script removed ambiguous sites. CDS <300 bp were not used for phylogenetic analyses. The best  
586 evolutionary model, GTR+G+I<sup>16</sup>, was estimated using jModelTest 2.1.1<sup>17</sup>. A coalescent species tree  
587 was constructed with bootstrap support with Astral<sup>24</sup> from individual CDS using the GTR+G+I  
588 model of sequence evolution. In addition, a concatenated analysis of the coding sequence was also  
589 done to estimate the concatenated CDS tree. The CDSs were concatenated and the substitution  
590 model GTR+G+I was used to create an ML tree with RaxML<sup>14</sup>. A AU topology test was made on  
591 the CDS topology using the CONSEL version 1.20<sup>15</sup> and the species tree (Fig. 2A).

592 In order to extract the complete mt genomes from Illumina sequence data, the reads for  
593 different bear species were mapped to their respective published complete mt genome sequences  
594 using BWA version 0.7.5a<sup>25</sup>. Consensus sequences were created using Samtools version: 0.1.18<sup>26</sup>,  
595 aligned by MAFFT version 7.154b<sup>22</sup> to 32 published sequences (Accession numbers see  
596 Supplementary Fig. 12), and MrBayes version 3.2.2<sup>27</sup> was used to create the Bayesian phylogenetic  
597 tree using the best fitting GTR+G+I model of sequence evolution. The analysis was run for  
598 4,000,000 generations with a sample frequency of 4,000 with default priors and an arbitrary burn in  
599 of 25% of the samples. Convergence was assessed using the average standard deviation of split  
600 frequency which reached < 0.01 and potential scale reduction factor close to 1.00.



601 **Divergence time estimation**

602 A well-documented fossil from the giant panda lineage at 12 million years ago (Ma)<sup>28</sup> with a  
603 maximum calibration point of 20 Ma based on mitochondrial estimates<sup>29</sup> was used to provide the  
604 calibration point needed in PAML MCMCtree<sup>30</sup> to estimate divergence times on 5,151,660 bp  
605 coding sequence data. In addition, the divergence time of Tremarctinae was set to 7-13 Ma<sup>31</sup>.  
606 Divergence time estimates of Ursinae was based on the occurrence of *U. minimus* at 4.3-6 Ma<sup>32</sup>,  
607 and a polar/brown bear divergence was given a range of 0.48-1.1 Ma<sup>7,20,33</sup>. The calibration points  
608 were used to estimate divergence times in MCMC tree in PAML<sup>30</sup> with a sample size of 2,000,000,  
609 burn-in of 200,000, and tree sampling every second iteration. Convergence was checked by  
610 repeating the analysis again.

611 **Genome error estimation**

612 Following a approach described by<sup>34</sup> the genome error rate was estimated in 3-way alignment  
613 including the sample genome, a high-quality genome and a genome representing ancestral states.  
614 We considered the genome sequence of the brown bear (ABC) as high-quality given a 38X  
615 coverage, which was the highest among our sampling. The genome sequence of the spectacled bears  
616 represents the ancestral state in the alignment. The test assumes the same evolutionary distance  
617 between sample and the high quality genome. As errors in the high quality genome never can be  
618 ruled out, the error rate is the excess error relative to the high quality genome.

619 The genome error  $\varepsilon$  is defined by the equation:

620 
$$OD = ED (1-\varepsilon) + EA \varepsilon \quad (1)$$

621 solved for  $\varepsilon$

622 
$$\varepsilon = (OD - ED) / (EA - ED) \quad (2)$$

623 with

624 OD, observed number of derived sites in the sample

625 ED, expected number of derived sites

626 EA, expected number of ancestral sites in the sample.

627 Error rates were calculated for 67 Mb of the genome (scaffold1).

628 We report very low error rates between -0.00058 and 0.00037. The estimates are in the range of

629 error rates as reported for equid genomes <sup>34</sup>.

630

### 631 **CoalHMM analysis**

632 CoalHMM <sup>9</sup> was used to estimate whether a pair of species showing gene flow in *D*-statistic and

633 *D<sub>FOIL</sub>* analyses, diverged in allopatry or in sympatry with gene flow. In this analysis pair wise

634 Akaike Information Criteria (AIC) <sup>35</sup> values from the isolation model and isolation with migration

635 model are compared on the basis of different population parameters. We selected 10 Mb of non-

636 overlapping genomic fragments and set the effective population size ( $N_e$ ) to 20,000 for all bears,

637 which represents approximately an average estimate by the PSMC analyses (Fig 4, Supplementary

638 Fig. 20), removing extreme values. The time for species splits was set according to estimated

639 divergence times (Supplementary Table 7). These values seem more reliable than estimating

640 divergence times from population splits shown in PSMC analyses (Fig 6, Supplementary Fig. 19).

641 The generation time ( $g$ ) was set to 8 years, which is a reasonable average of the published values for

642 large and small-bodied bears <sup>36</sup>. The mutation rate was set to  $\mu = 1e-9$  changes/site/year which is

643 common rate in mammals <sup>8,37,38</sup> and the coalescent rate was determined to  $(g \cdot \mu \cdot N_a)^{-1} = 2,500$

644 with  $N_a$  being the ancestral effective haploid population size 50,000.  $N_a$  can be calculated from  $N_e$

645 <sup>39</sup>. The migration rate was set to 0.05 of the coalescent rate similar ( $C_A$ ) to previous publications

646 which is equal to the which equals 0.1 migrants per generation ( $Nem$ ) <sup>9,10</sup>. The recombination rate

647 was set to 1, which is a lower average from published observed values in carnivores and is typical

648 for mammals for which 0.5-1.1 cM/Mb are observed<sup>40</sup>. The migration time was 80% of the  
649 divergence time. Population parameters vary over time and some values are impossible to pin-point.  
650 Therefore, we analyzed the parameter space for the American black and Asiatic black bear species  
651 along with American black bear and brown bear species pair over a large parameter space. For  
652 details see the Supplementary Fig. 17 and 18 figure legends. All analyses clearly favored the  
653 migration model for the American black and Asiatic black bear as well as the brown and American  
654 black bear species pair. Some values are chosen to be unreasonably extreme for demonstrating the  
655 robustness of the data and conclusions for different settings.

656

#### 657 **X and Y chromosome (scaffold) tree**

658 Known X chromosome scaffolds<sup>5</sup> have been used to construct the coalescence species tree and  
659 phylogenetic network as described for the GFs analyses. A ML tree was constructed from  
660 concatenated Y chromosome scaffolds<sup>41</sup>, because of the non-recombining nature of the most of the  
661 Y-chromosome.

662

663

664

665

666

667

668

669

670

671

672

673

674

675

676

677

678

679

680

681

## 682 References

1. Kolter, L. European Sun Bear Studbook, Cologne zoo. (2013).
2. Krakowiak, M. European Asiatic Black Bear Studbook, Warsaw zoo. (2013).
3. Kolter, L. European Spectacled Bear Studbook, Cologne zoo. (2014).
4. Langguth, S. European Sloth Bear Studbook, Leipzig zoo. (2014).
5. Cahill, J. A. *et al.* Genomic Evidence for Island Population Conversion Resolves Conflicting Theories of Polar Bear Evolution. *PLoS Genet.* **9**, e1003345 (2013).
6. Bidon, T. *et al.* Brown and polar bear Y chromosomes reveal extensive male-biased gene flow within brother lineages. *Mol. Biol. Evol.* **31**, 1353–1363 (2014).
7. Hailer, F. *et al.* Nuclear genomic sequences reveal that polar bears are an old and distinct bear lineage. *Science* **336**, 344–347 (2012).
8. Miller, W. *et al.* Polar and brown bear genomes reveal ancient admixture and demographic footprints of past climate change. *Proc. Natl. Acad. Sci.* **109**, E2382–E2390 (2012).
9. Mailund, T. *et al.* A New Isolation with Migration Model along Complete Genomes Infers Very Different Divergence Processes among Closely Related Great Ape Species. *PLoS Genet* **8**, e1003125 (2012).
10. Jónsson, H. *et al.* Speciation with gene flow in equids despite extensive chromosomal plasticity. *Proc. Natl. Acad. Sci. U. S. A.* **111**, 18655–18660 (2014).
11. Nowak, R. *Walker's Mammals of the World.* (Johns Hopkins Press, 1991).
12. Felsenstein, J. PHYLIP (Phylogeny Inference Package) version 3.6 Available from: Author Department of genome sciences, University of Washington. Seattle. (2005)
13. Rambaut, A. & Grassly, N. C. Seq-Gen: an application for the Monte Carlo simulation of DNA sequence evolution along phylogenetic trees. *Comput. Appl. Biosci. CABIOS* **13**, 235–238 (1997).
14. Stamatakis, A. RAxML Version 8: A tool for Phylogenetic Analysis and Post-Analysis of Large Phylogenies. *Bioinformatics* **30**, 1312–1313 (2014).
15. Shimodaira, H. & Hasegawa, M. CONSEL: for assessing the confidence of phylogenetic tree selection. *Bioinformatics* **17**, 1246–1247 (2001).
16. Lanave, C., Preparata, G., Sacone, C. & Serio, G. A new method for calculating evolutionary substitution rates. *J. Mol. Evol.* **20**, 86–93 (1984).

17. Darriba, D., Taboada, G. L., Doallo, R. & Posada, D. jModelTest 2: more models, new heuristics and parallel computing. *Nat. Methods* **9**, 772 (2012).
18. Gabriel, S. B. *et al.* The structure of haplotype blocks in the human genome. *Science* **296**, 2225–2229 (2002).
19. Carbone, L. *et al.* Gibbon genome and the fast karyotype evolution of small apes. *Nature* **513**, 195–201 (2014).
20. Liu, S. *et al.* Population genomics reveal recent speciation and rapid evolutionary adaptation in polar bears. *Cell* **157**, 785–794 (2014).
21. Lechner, M. *et al.* Proteinortho: detection of (co-)orthologs in large-scale analysis. *BMC Bioinformatics* **12**, 124 (2011).
22. Katoh, K., Misawa, K., Kuma, K. & Miyata, T. MAFFT: a novel method for rapid multiple sequence alignment based on fast Fourier transform. *Nucleic Acids Res.* **30**, 3059–3066 (2002).
23. Talavera, G. & Castresana, J. Improvement of phylogenies after removing divergent and ambiguously aligned blocks from protein sequence alignments. *Syst. Biol.* **56**, 564–577 (2007).
24. Mirarab, S. *et al.* ASTRAL: genome-scale coalescent-based species tree estimation. *Bioinformatics* **30**, (2014).
25. Li, H. & Durbin, R. Fast and accurate short read alignment with Burrows-Wheeler transform. *Bioinforma. Oxf. Engl.* **25**, 1754–1760 (2009).
26. Li, H. *et al.* The Sequence Alignment/Map format and SAMtools. *Bioinforma. Oxf. Engl.* **25**, 2078–2079 (2009).
27. Ronquist, F. & Huelsenbeck, J. P. MrBayes 3: Bayesian phylogenetic inference under mixed models. *Bioinforma. Oxf. Engl.* **19**, 1572–1574 (2003).
28. Abella, J. *et al.* Kretzoiarctos gen. nov., the Oldest Member of the Giant Panda Clade. *PLoS ONE* **7**, e48985 (2012).
29. Wu, J. *et al.* Phylogeographic and Demographic Analysis of the Asian Black Bear (*Ursus thibetanus*) Based on Mitochondrial DNA. *PloS One* **10**, e0136398 (2015).
30. Yang, Z. PAML 4: phylogenetic analysis by maximum likelihood. *Mol. Biol. Evol.* **24**, 1586–1591 (2007).
31. Tedford, R. H. & Martin, J. Plionarctos, a Tremarctine Bear (Ursidae: Carnivora) from Western North America. *J. Vertebr. Paleontol.* **21**, 311–321 (2001).
32. Gustafson, P. The vertebrate faunas of the Pliocene Ringold Formation, south-central Washington. University of Oregon, Mus. *Nat Hist Bull* **23**, 1–62 (1978).
33. Cahill, J. A. *et al.* Genomic evidence of geographically widespread effect of gene flow from polar bears into brown bears. *Mol. Ecol.* **24**, 1205–1217 (2015).

34. Orlando, L. *et al.* Recalibrating Equus evolution using the genome sequence of an early Middle Pleistocene horse. *Nature* **499**, 74–78 (2013).
35. Akaike, H. A new look at the statistical model identification. *IEEE Trans. Autom. Control* **19**, 716–723 (1974).
36. Onorato, D. P., Hellgren, E. C., van Den Bussche, R. A. & Doan-Crider, D. L. Phylogeographic Patterns within a Metapopulation of Black Bears (*Ursus americanus*) in the American Southwest. *J. Mammal.* **85**, 140–147 (2004).
37. Nachman, M. W. & Crowell, S. L. Estimate of the Mutation Rate per Nucleotide in Humans. *Genetics* **156**, 297–304 (2000).
38. Li, H. & Durbin, R. Inference of human population history from individual whole-genome sequences. *Nature* **475**, 493–496 (2011).
39. Wall, J. D. Estimating ancestral population sizes and divergence times. *Genetics* **163**, 395–404 (2003).
40. Wong, A. K. *et al.* A Comprehensive Linkage Map of the Dog Genome. *Genetics* **184**, 595–605 (2010).
41. Bidon, T., Schreck, N., Hailer, F., Nilsson, M. & Janke, A. Genome-wide search identifies 1.9 megabases from the polar bear Y chromosome for evolutionary analyses. *Genome Biol. Evol.* **7**, 2010–2022 (2015).
